# Supplementary material for: Impact of vaccination education in cardiac rehabilitation on attitudes and knowledge
Source: PLOS Glob Public Health. 2024 Mar 8;4(3):e0002610. doi: 10.1371/journal.pgph.0002610 (PMC10923443; doi:10.1371/journal.pgph.0002610)
Supplement: S1 Data — (XLSX) [file pgph.0002610.s001.xlsx]

## Sheet: PRE
GRUPO	P1	P2	P3	P4	P5	P6	P7	P8	P9	P9.1	P10-1	P10-2	P10-3	P10-4	P10-otros	P10.1	P11-T	P11-PW	P11-RS	P11-P	P11.1	P12	P13-1	p13-2	p13-3	p13-4	p13-5	p13-0	P14	P14.1	P15	P15.1	P16	P17-1	P17-2	P17-3	P17-4	P17-5	P17-6	P17-otros	P18	P18.1	P19	P20-PFIZER	P20-MODERNA	P20-AZ	P20-JANSSEN	P21	P21.1-T
116	19	1	3		MADRID	1	1	0	0		0	1	0	0			4	5	6	7		5	0	0	0	0	0	1	1		0	1		1	1	0	0	0	0		0		1	4	4	4	4	1
64	32	1	4		rivas	1	0	1	1	2	0	0	0	0			3	4	3	4		5	0	0	0	0	0	1	1		1			1	1	0	0	0	0		1	FIEBRE	0	5	5	5	5	1	1
65	39	1	3		VALLECAS	1	1	0	0		0	1	1	0		INSTAGRAM	3	3	2	3		5	0	0	0	0	0	1	1		0	1		1	1	0	0	0	0		0		1	4	4	4	4	1	1
79	39	0	4		VALLECAS	1	1	0	1	1	0	1	0	0	FAMILIA		4	4	3	5		5	0	0	0	0	0	1	1		0	1		1	1	0	0	1	1		0		0	5	4	4	4	1	1
22	40	1	3		COSLADA	1	1	0	0		1	1	0	1	MEDICOS		3	3	1	4	5	5	0	0	0	0	0	1	1		1			1	1	0	0	1	0	SALUD GRUPAL	1	DOLOR BRAZO, FATIGA	1	4	4	4	4	1	1
18	41	0	4		ARGANDA	1	1	0	1	1	0	0	0	0	PERSONAL SANITARIO		1	1	1	1	5	5	0	0	0	0	0	1	1		1			1	1	0	0	1	0		1	CANSANCIO	0	4	4	4	4	1	0
53	42	1	5		SAN FERNANDO DE H	1	1	0	0		0	0	0	1	MEDICOS		2	2	1	3	5	5	0	0	0	0	0	1	1		0	1		1	0	0	0	0	0		0		1	4	4	4	4	1
110	42	1	4		ENTREVIAS	1	1	0	1	1	0	1	0	0			3	2	1	4		5	0	0	1	0	0	0	1		1			1	1	0	0	1	1		0		0	5	5	5	4	1	1
82	44	0	4		LEGANES	1	1	0	0		1	1	0	0			4	4	1	4		5	0	0	0	0	0	1	1		0	1		1	1	1	0	1	0		1	FIEBRE, MAL ESTAR	0	5				1	1
28	46	0	4		MORATALAZ	1	0	0	1	1	1	1	0	0			4	3				4	0	1	0	0	0	0	1		0	1		1	0	0	0	0	1		1	FIEBRE, MALESTAR	0	3	3	2	2	1	1
23	47	1	4		RIVAS	1	1	0	1	1	0	0	0	1			3	0	0	4		5	0	0	1	0	0	0	1		0	1		1	1	0	0	1	0		0		1	4	4.5	2	3	0
30	47	0	5		COSLADA	1	1	0	0		0	0	0	0	TRABAJO		2	1	1	2	4	4	0	0	0	0	0	1	1		0	1		0	1	1	0	0	0		1	FIEBRE, DOLOR MUSCULAR	1	4	3	2	2	1	1
66	48	1	2		RIVAS	1	0	0	1	1	1	0	0	0			4					5	0	0	0	0	0	1	1		1			1	0	0	0	0	0		0		1	5				1	1
56	50	1	3		PARQUE AVENIDAS	1	0	0	1	1	1	1	0	0			4	4				4	0	0	0	0	0	1	1		0	1		1	1	0	0	0	0		1	MALESTAR, FIEBRE	0	4				1	1
62	50	1	3		MORATALAZ	1	1	0	1	1	1	1	0	0			5	3	2	5		5	0	0	0	0	0	1	1		1			1	0	0	0	1	0		0		0	3	5	3	3	0
55	51	1	5		TETUAN	1	1	0	1	1	1	1	0	1			3	3	1	4		5	0	0	0	0	0	1	1		1			1	1	0	0	1	1		1	REACION ALERGICA, INFLAMACION GANGLIOS	1	5	5	4	3	1	1
50	52	1	3		COSLADA	1	1	0	0						2		4	2	2	4		5	0	0	0	0	0	1	1		0	1		1	1	1	0	1	0		0		0	5	5	5	5	1
54	52	1			VALDEMORO	1	1	1	0		0	1	0	0			4	3	3	4		5	1	0	0	0	0	0	1		1			1	0	0	0	1	0		0		1	4	4	4	4	1	1
63	53	0	4		vallecas	1	1	0	0		1	1	0	0			3	4	3	3		5	0	0	0	0	0	1	0	0			1, 2										0					0
74	53	1	4		CIUDAD LINEAL	1	1	0	0		0	1	0	0			3	3	3	3		5	0	0	0	0	0	1	1		1			1	1	0	0	1	0		1	DOLOR BRAZO	0	3	3	3	3	1	0
115	53	0	5		RIVAS	1	1	0	1	1	0	0	0	0	MEDICO		1	1	1	1		5	0	0	0	0	0	1	1		0	1		1	1	1	0	0	1		0		1	4	4	4	4	1
90	53	1	4		COLMENAR DE OREJA	1	0	1	0		1	0	0	0			5						0	0	1	0	0	0
58	54	0	5		MONTECARMELO	1	1	0	0		0	1	1	0		TWITTER	3	2	4	1		5	0	0	0	0	0	1	1		1			1	1	0	0	0	0		1	FIEBRE, DOLOR CABEZA	0	5	5	2	3	1
70	54	1	5		PARACUELLOS DEL JARAMA	1	1	0	1	1	0	1	1	1	ASOCIACIONES Y PLATAFORMAS DE AFECTADOS Y PROFESIONALES	TWITTER	2	2	2	3	5	5	0	0	0	0	0	1	1		1			1	1	0	0	1	1		1	FIEBRE, DIARREA, DEBILIDAD , DOLOR MUSCULAR Y CABEZA	1	5	5	4	5	1	1
95	54	1	5		moratalaz	1	1	0	0		1	0	0	0			3	3				5	0	0	0	0	0	1	1		1			1	1	0	0	0	0		0		1	4	4			1	1
1	55	1	3		villaverde	1	1	0	0		1	0	0	0			3					4	0	0	0	0	0	1	1		1																	1
5	55	0	3		pueblo	1	1	0	1	2	0	1	0	0								5	0	0	0	0	0	1	1		1			1	0	0	0	0	0		1		0	5				1	1
27	55	0	4		MORATALAZ	1	1	0	0		1	1	0	0			4	4	2	4		5	0	1	0	0	0	0	1		1			1	1	0	0	0	1		1		0	4	4	4	4	1	1
76	55	1	2			1	1	0	0		1	0	0	0			2					1	0	0	0	0	0	1	1		1			1	1	0	0	0	0		0		0	1	1	4	4	0	1
9	56	1	4		ARGANDA	1	1	0	0		1	1	0	0		TW, FB, MINIST	4	4	3	4		5	1	0	0	0		1	1		1			1	1	0	0	0	0		1	CANSANCIO, DOLOR BRAZO	1	5	5	4	5	1	1
36	56	1	2			1	1	0	0		1	0	0	0			4					5	0	0	0	0	0	1	1		1			1	1	0	0	1	0		0		0	5				1
67	56	1	4		STA EUGENIA	1	1	0	1		0	1	0	0			3	3	1	3	3	5	0	0	0	0	0	1	1		0	1		1	0	0	0	0	1		0		0		5			0
29	57	0	3		VALLECAS	1	1	0	0		1	1	0	0			4	5				5	0	0	0	0	0	1	1		1			1	1	0	0	0	0		1	CANSACIO, DOLOR BRAZO	0	4	4	4	4	0
47	57	0	3		VICALVARO	1	1	0	0		1	1	0	0			4		1			5	0	0	0	0	0	1	1		1			1	1	0	0	0	1		0		0	4	4			1	1
10	58	1	4		VALLECAS	1	1	0	1	1	1	0	0	1			3	2	2	3		5	1	1	0	1	0	0	1		1			1	1	0	0	1	1		0		0	3			3	1	1
14	58	1	2		VILLAVERDE	1	1	0	0		1	0	0	0			1	1	1	4		5	0	0	0	0	0	1	1		1			1	1	0	0	1	0		0		0	4	4	3	5	1	1
21	58	1	4		MORATALAZ	1	1	1	1	1	1	0	0	1			3	1	1	3		5	0	0	0	0	0	1	1		0	0		0	0	0	0	1	0		1		1	1	1	1	1	0	1
34	58	1	5		PUEBLO	1	1	1	1	1	1	0	0	0			1	1	1	3			0	0	1	0	0	0	1		1			1	1	0	0	0	0		0		1					0
78	58	0	4		MORATALAZ	1	1	1	1	2	0	1	0	0		YOUTUBE	3					3	0	0	1	0	0	0	1		1			1	0	0	0	0	0		1	LEVE FIEBRE	0		4			0
87	58	1	1		ARGANDA	1	1	0	0		1	0	0	0			2					3	0	0	0	0	0	1	1		1			1	1	1	0	0	0		0		0	5				0
6	59	0	3		vallecas	1	1	0	1	1	0	0	0	1			2	2	1	3		5	0	0	0	0	0	1	1		1			1	1	0	0	1	0		1	FIEBRE, DOLOR MUSC	0	2	2			1	1
104	59	1	3		RIVAS	1	1	0	0		1	0	0	0			5					5	0	0	0	0	0	1	1		1			1	1	0	0	0	0		0		0	5	5			1	1
109	59	0	5		ADEDLFAS	1	1	0	0		1	1	0	0	FAMILIA Y AMIGOS		4	3		4	2	5	0	0	0	0	0	1	1		1			1	1	1	0	1	1		0		0	4	4	4	3	1	1
97	60	0	4		CARABANCHEL	1	1	1	1	1	0	1	0	1			2	3	1	5		3	1	0	1	0	0	0	1		1			1	1	0	1	1	1		1	CAIDA DE PELO, DOLOR PIERNAS	0	5				1	1
8	61	1	5		las rosas	1	0	0	1	1	1	0	0	0			5					5	0	0	1	0	0	0	1		0	1		1	0	0	0	0	0		0		1		5	5		1	1
16	61	1	4		ENTREVIAS	1	1	0			1	1	0	0			4	2	2	3		5	0	0	0	0	0	1	1		1			1	0	0	0	0	0		1	MALEST, FIEBRE	1	4	4	4	4	0	1
32	61	1	3		CHAMARTIN	1	1	1	1	1	1	1	0	1			3	3	0	3		5	0	0	0	0	0	1	1		1			1	1	1	0	1	1		1	CANSANCIO, DOLOR CABEZA, MALESTAR	1		5			1	5
45	61	1	5		MADRID	1	1	0	1	1	1	1	1	1			3	3	3	3		5	0	0	0	0	0	1	1		0	1		1	1	0	0	1	0		1	MALESTAR	1	3	3	3	3	1
92	62	1	4		NUEVO BAZTAN	1	1	0	0		1	0	0	0			3					5	0	0	0	0	0	1	1		0	1		1	1	0	0	0	0		0		1					1	1
46	63	1	3		VALLECAS	1	1	0	1	1	0	1	0	0			1	2	2	2		3	0	0	0	0	0	1	1		1			1	1	1	0	0	0		0		0			3		1
60	63	1	2		CUATRO VIENTOS	1	1	0	1		1	0	0	1			3			3			0	0	0	0	0	1	1		1			0	1	0	0	0	1		0		1	2		4		1	1
94	63	1	5		VALLECAS	1	1	0	1	1	1	1	0	0				5				5	0	0	0	0	0	1	1		1			1	1	0	0	1	1		1	FIEBRE	1	4	3	1	2	1	1
2	64	1	6		moratalaz	1	1	1	0		1	1	0	0			1	3				4	1	1	0	0	0	0	1		1			0	1	0	1	1	0		0		0	2	2	2	2	1	1
75	64	1	5		VALLECAS	1	1	0	1	1	0	1	0	0			2	3	0	2		5	0	0	0	0	0	1	1		1			1	1	0	0	1	1		1	FIEBRE, VOMITOS	0	3	4	3	3	1	0
4	65	1	2		vallecas	1	1	0	0		1	0	0	0			3	3	3	3			0	0	0	0	0	1	1		1			1	1	0	0	0	0		0		0	5	5	5	5	1	1
33	65	0	2		VICALVARO	1	1	0	0		1	1	0	0			5	3	3	5		5	0	0	0	0	0	1	1		1			1	0	0	0	0	1		0		0	4	4	4	4	1
68	65	1	5		RETIRO	1	1	0	1		0	1	0	0			3	4	2	3		5	0	0	0	0	0	1	1		0	1		1	1	0	0	0	0		0		1	4	4	4	4	1	1
102	66	1	3		COSLADA	1	1	0	0		1	0	0	0			5					5	0	0	0	0	0	1	1		1			1	1	0	0	0	0		0		0			5		0
11	67	1	2		RIVAS	1	1	0	0		0	1	0	0			5					5	0	0	0	0	0	1	1		1			1	1	0	0	0	0		0		0		4	4		1	1
71	67	0	5		RETIRO	1	1	0	0		1	0	0	1			4	4	2	4		4	0	0	1	0	0	0	1		1			1	1	0	0	1	1		1	FIEBRE	0	4	4	3	3	1	1
93	68	0	5		QUINTANA	1	1	0	0		1	0	1	0		FACEBOOK	3	3	4	3	3		0	0	1	0	0	0	1		1			1	0	0	0	1	0		1	CANSANCIO	1	3	3	2	2	1
114	68	1	5		VALLECAS	1	1	0	0		1	1	0	0			3			3		5	0	0	0	0	0	1	1		1			1	1	0	0	0	0		1	DOLOR BRAZO	0	3	3	3	3	1	1
117	68	0	2		MOSTOLES	1	0	0	1		0	1	0	0			1	4	1	2		4	0	1	1	0	0	0	1		1			1	1	0	0	1	0		1	NEUMONIA	1	11	3	4	2	0
73	68	0	4		MORATALAZ	1	1	0	1	1	0	0	0	0	HOSPITAL					4		5	0	0	0	0	0	1	1		1			0	0	0	1	0	0		1	CANSANCIO	0		5			1	0
31	69	0	3		SAN DIEGO	1	1	0	0		0	1	0	0			4					5	0	0	0	0	0	1	1		1			0	0	0	0	1	0		1	FIEBRE	0		5		5	1	1
37	69	1	4		RIVAS	1	1	0	0		1	0	0	1			5			5		5	0	0	0	0	0	1	1		1			1	1	0	0	1	0		0		0	5	5	5	5	1	1
40	69	1	5		VALDEBERNARDO	1	1	0	0		1	0	0	1			4	4	3	5		5	0	0	0	0	0	1	1		1			1	1	0	0	0	0		0		1		4	4		1	1
3	70	1	4		portazgo	1	1	0	0		1	1	1	1			3	3	2	4		5	0	0	0	0	0	1	1		1			1	1	0	0	1	1		0		1	5				1	1
72	70	0	5		SALAMANCA	1	1	0	0		1	0	0	1	DIARIO MEDICO		3	1	1	4	5		0	0	0	0	0	1	1		1			1	1	0	0	1	1		0		1	4	4	2	2	1
44	71	0			VALLECAS	1	1	0	0		1	0	0	0			5			5		5	0	0	0	0	0	1	1		1			1	1	0	0	1	0		0		1	5	5	5	5	1
20	72	1	6		SALAMANCA	1	1	0	0		1	1	0	1	PUBLICACIONES MEDICAS		3	4		3	4.5	5	0	0	1	0	0	0	1		1			1	0	0	0	1	0		0		1	4	4	3	3	1	1
38	72	1	5		RETIRO	1	1	0	0		1	0	0	1			2			4		5	0	0	0	0	0	1	1		1			1	1	0	0	0	1		0		0	4				1	1
42	72	1	6		PACIFICO	1	1	0	0		0	0	0	0	CDC USA		2	2	2	2	5	5	0	0	0	0	0	1	1		1			1	1	0	0	1	1		0		1	4.5	4.5	3	3.5	1	1
61	72	0	2		POZUELO	1	1	0	0		1	0	0	0			3					5	0	0	0	0	0	1	1		1			1	1	0	0	1	0		0		1	5				1	1
7	73	1	4		pueblo nuevo	1	1	1	1	3	0	0	0	0									0	0	1	0	0	0	1		1			0	1	0	0	0	0		0		0					1
17	74	1	2		VICALVARO	1	0	0	0		1	0	0	0			5					5	0	0	1	0	0	0	1		1			1	1	0	0	1	0		0		0					0	1
86	74	1	4		IBIZA	1	1	0	1	1	1	0	0	1			2			2			0	0	0	0	0	1	1		1			1	0	0	0	0	0		0		0					0
13	75	1	5		CARABANCHEL	1	1	0	0		0	1	1	0	MEDICO		2	2	2	2	4	5	0	0	0	0	0	1	1		1			1	1	0	0	1	0	SENTIDO COMUN	0			5	4	4	3	1	1
39	75	1	4		MORATALAZ	1	1	0	0		1	1	0	1			4	3		4		5	0	0	0	1	0	0	1		1			1	1	0	0	1	0		0		1	5				1	1
57	75	1	2		ARGANDA	1	0	0	1	1	0	0	0	0	SANITARIOS		1					5	0	1	0	0	0	0	1		1			1	1	0	0	0	0		1	FIEBRE	0	5				1
81	76	0	2		PACIFICO	1	1	0	1	1	1	0	0	0			5					5	0	0	0	0	0	1	1		1			1	0	0	0	0	0		0		0	5				1	1
99	77	1	5		RETIRO	1	1	0	0		1	1	0	1			4	3	1	4		5	0	0	0	0	0	1	1		1			1	1	0	0	1	0		0		1	5	4	5	4	1	1
80	80	1	5		MORATALAZ	1	1	0	0		0	1	0	1			3	4	2	4		3	0	0	1	1	0	0	1		1			0	0	0	0	0	1		0		1	3				1	0
84	81	1	2		MORATALAZ	1	1	0	0		1	0	0	1			4			4		5	0	0	0	0	0	1	1		1			1	1	0	0	1	0		0		0	5				1
41	82	0	5		0	1	1	0	0		1	0	0	0			3			4		5	1	0	0	0	0	0	1		1			1	1	0	0	0	1		0		0	5				1	1
	85	85	83
TOTAL	85
OFRECIDO	117
RECHAZADO	32
		27																					85																		82
SUMA	5080	58	315	0	0	85	76	10	34	35	53	43	7	24	2	0	258	159	90	204	46	364	6	6	14	3	0	63	83	0	66	16	0	74	63	8	3	40	24	0	31	0	35	277	219	183	163	69	56
							0.894118	0.117647	0.404762		0.630952	0.511905	0.0833333	0.285714																													82					16
MEDIA	59.7647	0.682353	3.79518	#DIV/0!	0	1	0.894118	0.117647	0.404762	1.16667	0.630952	0.511905	0.0833333	0.285714	2	#DIV/0!	3.18519	2.83929	1.875	3.45763	4.18182	4.72727	0.0705882	0.0705882	0.164706	0.0352941	0	0.741176	0.988095	0	0.795181	0.941176	#DIV/0!	0.902439	0.768293	0.097561	0.0365854	0.487805	0.292683	#DIV/0!	0.378049	#DIV/0!	0.426829	4.19697	3.98182	3.58824	3.54348	0.821429	0.982456
MEDIANA	59	1	4	#NUM!	0	1	1	0	0	1	1	1	0	0	2	#NUM!	3	3	2	4	5	5	0	0	0	0	0	1	1	0	1	1	#NUM!	1	1	0	0	0	0	#NUM!	0	#NUM!	0	4	4	4	4	1	1
MODA	58	1	4	#N/A	VALLECAS	1	1	0	0	1	1	1	0	0	#N/A	#N/A	3	3	1	4	5	5	0	0	0	0	0	1	1	#N/A	1	1	#N/A	1	1	0	0	0	0	#N/A	0	#N/A	0	5	4	4	4	1	1
DESV EST	11.6339	0.468324	1.17659	#DIV/0!	#DIV/0!	0	0.309513	0.324102	0.493794	0.461133	0.485445	0.50286	0.278045	0.454467	#DIV/0!	#DIV/0!	1.15229	1.1406	1.16006	1.11914	1.07872	0.700308	0.257656	0.257656	0.373116	0.185617	0	0.440588	0.109109	#DIV/0!	0.406023	0.242536	#DIV/0!	0.298546	0.424519	0.298546	0.188897	0.502927	0.457794	#DIV/0!	0.487884	#DIV/0!	0.497661	1.31523	0.971652	1.06163	1.04789	0.385293	0.612117
																																											0.426829
P17-1	P17-2	P17-3	P17-4	P17-5	P17-6		P23.2-1	p23.2-2	p23.2-3	p23.2-4	p23.2-5	p23.2-6			P28.2-1	p28.2-2	p28.2-3	p28.2-4	p28.2-5	p28.2-6	M1	M2	M3						M4	M5	M6
							1	0	0	0	1	0									1
0	1	0	1	1	0		1	0	0	0	0	1			0	0	0	0	1	0
1	1	0	0	1	1		1	1	1	0	1	1			1	1	1	0	1	1
1	1	0	0	0	0		0	0	0	0	1	0
1	0	0	0	0	0
1	1	0	0	1	0		1	0	0	0	1	0
0	1	0	0	0	0		1	0	0	0	0	0			1	1	0	0	0	0
1	0	0	0	0	0
1	1	0	0	0	0		1	0	0	0	1	0			1	0	0	0	1	0
1	1	0	0	1	1		1	1	0	0	1	1			1	0	0	0	1	1
1	1	0	0	0	0		1	0	0	0	0	0			1	0	0	0	1	0
1	1	0	0	1	0		1	1	0	0	1	1			1	1	0	0	1	1
1	1	0	0	1	0		1	0	0	0	1	0			1	0	0	0	1	0
1	0	0	0	0	0		1	1	0	0	0	0
1	1	0	0	1	0		1	1	0	0	0	1			1	1	0	0	1	0
1	1	0	0	1	0
1	0	0	0	1	0		1	0	0	0	0	0			1	0	0	0	0	0
0	0	0	0	1	0
1	1	0	0	1	0
1	1	0	0	1	0		1	1	0	0	0	1
1	1	0	0	0	1
1	0	0	0	0	1		1	0	0	0	1	1
1	1	0	0	0	0
0	1	1	0	0	0
0	0	0	0	1	0		0	0	0	0	1	0			0	0	0	0	1	0
1	1	1	0	1	1		1	1	0	0	1	1
1	0	0	0	0	1		1	0	0	0	1	0			1	0	0	0	1	0
1	1	0	0	0	0										1	2	0	0	0	0
1	1	0	0	1	0		1	0	0	1	1	0
1	1	0	0	1	0
1	1	0	0	0	1		1	0	0	0	1	0
1	1	0	0	1	0		1	1	1	0	0	0			1	1	0	0	1	0
1	1	0	0	0	0		1	0	0	0	0	1			1	0	0	0	0	0
1	1	0	0	0	1		1	1	0	0	1	1			1	1	0	0	1	0
1	1	0	0	1	1		1	1	0	0	1	1			1	0	0	0	1	0
1	1	0	0	1	0		1	1	0	0	1	0			1	1	0	0	1	0
1	1	0	0	1	0		1	1	0	0	1	0			1	0	0	0	1	0
1	1	1	0	0	0
1	1	0	0	0	1		1	0	1	0	0	1
1	1	1	0	1	0		1	1	0	0	1	0
1	0	0	0	0	0
1	0	0	0	1	0
1	1	0	0	1	1		1	0	0	0	0	0
1	1	0	0	0	0
1	1	0	0	0	0		1	0	0	0	0	0			1	0	0	0	0	0
1	1	0	0	0	0		1	0	0	0	1	0
0	1	0	0	0	1		1	1	0	0	0	1			1	1	0	0	0	1
1	1	0	0	1	0		1	1	0	0	1	0			1	1	0	0	1	0
1	0	0	0	1	0		1	0	0	0	1	0
1	1	0	0	0	0		1	0	0	0	1	0			1	0	0	0	1	0
1	1	0	0	0	0		1	1	0	0	0	0
1	0	0	0	0	0
1	0	0	0	0	1		1	1	0	0	0	1
1	1	0	0	0	0		1	1	0	0	0	0
1	1	0	0	1	1
1	1	0	0	1	1		1	1	0	0	1	1			1	0	0	0	1	1
1	1	0	0	1	1		1	1	0	0	1	1			1	1	0	0	1	1
0	0	0	1	0	0		0	0	0	0	1	0
1	1	0	0	1	0		0	0	0	0	1	0			0	0	0	0	1	0
1	1	0	0	1	1		1	1	0	0	1	1			1	0	0	0	1	0
1	1	0	0	0	0		1	1	0	0	0	0			1	0	0	0	0	0
1	0	0	0	0	0
1	1	0	0	1	1
0	0	0	0	0	1		0	0	0	0	0	1			0	0	0	0	0	1
1	0	0	0	0	0		1	0	0	0	0	0
1	1	1	0	1	0		1	0	0	0	1	0
1	1	0	0	1	0		1	1	0	0	1	1
1	0	0	0	0	0		1	0	0	0	1	0			0	0	0	0	1	0
1	1	1	0	0	0
							1	0	0	0	0	0
1	1	0	0	0	0		1	0	0	0	1	0			1	0	0	0	1	0
1	0	0	0	1	0		1	0	0	0	1	0			1	0	0	0	1	0
1	1	0	0	1	1		1	1	0	0	1	1			1	1	0	0	1	0
1	1	0	0	0	0		1	0	0	0	0	0
1	1	0	1	1	1		1	1	0	0	0	1
1	1	0	0	1	0		1	1	0	0	1	0			1	0	0	0	1	0
1	1	0	0	0	0		1	1	0	0	0	0			1	1	0	0	0	0
1	1	0	0	0	0
1	1	1	0	1	1		1	1	1	0	0	1			1	1	1	0	0	1
1	1	0	0	1	1		0	0	0	0	1	0			1	0	0	0	1	0
1	1	0	0	0	0
1	1	1	0	0	1		1	0	0	0	1	0
1	1	0	0	0	0		1	0	0	0	0	0			1	0	0	0	0	0
1	1	0	0	1	0										1	1	0	0	1	0
[truncated: 39 more columns]

## Sheet: POST
POST	P1	P2	P3-1	p3-2	p3-3	p3-4	p3-5	p3-6	P3-OTROS	P4	P5	P6	P6.1	P7	P8-PFIZER	P8-MODERNA	P8-ASTRAZENECA	P-8JANSSEN	P9	P9.1	P10	P10.1	P11	P12	P13-T	P13-PW	P13-RS	P13-P	P13-otros	P14	P15
1	5	5	1	1	1	0	1	0		0	1	1		1	5	5			1		1		1	1	4					1	3
2	4	5	1	1	0	0	1	0		1, 2				1	2	2	1	1	1	3	1	1			2	3	1	2		1	3
3	5	5	1	1	1	0	1	1		0				1	5				1	3	1	1, 2			3	1	1	3		1	3
4	5	5	1	1	0	0	1	0		0				1	5	5	5	5	1	3	0		0	2	3	3	3	3		0	3
5	5	5	1	1	0	0	0	0		0	1	1		1	5				1	3	1	1	1	1	2					0	3
6	4	5	1	1	0	0	1	0		0				1	5	5			1	3	1	1		1	3	3		3		1	3
8	5	5	1	0	0	0	0	0		0	1	1		1		5	5		0		0		1	1	5					0	2
9	4	5	1	1	0	0	1	0		0				1	4	4	4	4	1	3	1	1			3	4	3	4	INFO MEDICA 4	0	3
10	5	5	1	1	0	0	1	1		0				1	5	5	4	4	1	3	1	1			3	1	1	3		0	3
11	5	5	0	0	0	0	0	0		1				1	4	5	4	3	1	3	1	2			5	5	1	5		0	2, 3
13	3	5	1	0	0	0	1	1		0				1	4				1	3	1	1, 2			2	3	3	2	MEDICOS Y SANITARIOS 4	1	3
14	5	5	1	1	0	0	1	1		0				1	5	5	3	5	1	3	1	1			4	2	1	4		2	3
16	5	5	1	1	0	0	0	0		0				1	4	4	4	4	1	3	1	1			4	2	1	3		1	3
17	4	5	1	0	0	0	1	1		0				1			5	5	1	3	1	1							PERSONAL SANITARIO	0	3
18	5	5	1	1	1	0	1	0		0				1	4	5	4	4	1	3	1	1	1	1	1	1	1	1		1	3
20	4	5	1	1	0	0	1	0		0				1	4	4	3	3	1	3	1	1			3	3	1	3		0	3
21	4	4	0	1	0	0	1	1		0		0	2	1	2	2	1	1	1	3	1	1	2	1	3	1	1	3		1	3
22	4	5	1	1	1	1	1	1		0				1	5	5	5	5	1	3	0		0	2	3	2	1	4		0	3
27	5	5	1	1	0	0	0	1		0				1	4	4	3	3	1	3	1	1	1	1	5	4	2	4		0	2, 3
29	5	5	0	1	0	0	0	0		0		1		1	4	4	3	3	1	3	1	1	2	2	2	2	3	3	SANITARIO 5	1	3
31	4	5	1	1	0	0	0	1		0				0					1	3	1	1, 2					3			0	3
32	4	5	1	1	1		1	1		0				1		4			1	3	1	2		2	2	3	2	3		1	3
36	3	4	1	0	0	0	1	0		0				0	4				1	3	0			2		4				1	3
37	4	5	1	0	0	0	0	0		3					5	5	5	5	1	1	1	2	2	2	5	1	1	5		1	2, 3
38	4	5	1	1	0	0	0	1	CONCIENCIA SOCIAL	0				0	4				0	0					3			4		1	3
39	5	5	1	1	0	0	0	0		3				1	4	4	4	4	1	3	0				1	1	1	2		2	3
40	4	4	1	1	0	0	0	0		0				1	4	4	4	3	1	3	1	1				4		4		1	3
41	5	5	1	1	1	0	1	1		0				1	5				1	3	1	1			2			3	MEDICO 5	1	3
42	5	5	1	1	0	0	1	0	RESPONSABILIDAD SOCIAL	0				1	4.5	4.5	3.5	3.5	1	3	1	2			3	2	0	2	PROFESIONAL MEDICINA 5	1	3
44	5	5	1	1	0	0	1	0		0	1			1	5	5	2	5	1	3	1	1	1	1	5	5	5	5		1	3
45	5	5	1	1	0	0	0	0		1				1					1	3	1	2	1	1	3			3		1		CHARLAS, MEDICOS, PROFESIONALES
46	4	5	1	1	0	0	1	1		0				1	4	4	4	4	1	3	1	2	2	2	1	1	1	1	MEDICO 5	1	3
47	4	5	1	1	0	0	0	1		0				1	4	4	3	3	1	3	1	1		1	3	0	0	3		0	3
53	5	5	1	1	0	0	0	0	PROTEGER EN GENERAL	0	1	1		1	5				1	3	0	3	1	1	5					1	3
54	5	5	1	1	0	0	0	0		0				1	4	4	4	4	1	3	1	1	1	2	4	3	1	4		2	3
55	4	5	1	1	1	0	0	1		0		1		1	4	5	4	4	1	3	1	1		1	3	3	1	4		1	5
58	5	5	1	1	0	0	1	0		0				1	5	5	3	3	1	3	1	1		1	4	3	2	4	5 MEDICO	1	3, 4
60	5	5	1	1	0	0	1	0		3	1	1	1	1	5				1	3	1	1	1	1	2	1	1			1	3
61	5	5	1	1	0	0	0	1		4				1	5				1	3	1	3								1
62	5	5	1	1	0	0	0	0		3				1		5			1	3	1	1	1	1	5	3	2	4		0	3
63	4	4	1	0	0	0	0	0		0	2			1	3	3	2	2	1	3	1	1	1	1	3	3	3	3		0	1, 2, 3, 4
64	5	5	1	1	0	0	1	0		0				1	5	5	5	5	1	3	1	1	1	1	4	3	3	3		1	3
65	4	5	1	1	1	0	0	0		0		1		1	5	5	4	4	1	3	1	1	1	1	3	3	3	3	MEDICO 5	1	3
68	5	5	1	1	0	0	0	0		0	1	1		1	5	5	5	5	1	3	1	1	1	1	4	3	2	4		1	3
70	5	5	1	1	0	0	1	1	ACABAR CON ENF	0	1			1	5	5	3	5	1	3	1	3	2	2				5	PLATAFORMAS ENF	1	3
71	5	5	1	1	0	0	1	1		0				1	4	4	3	3	1	3	1	1			3	3	2	3		0	3
73	5	5	1	0	0	0	0	0		0	1	1		1		5			1	3	0	2	1	1					PERSONAL SANITARIO	1	3
74	5	5	1	1	0	0	0	0		0	1	1		1	5	5	5	5	1	3	1	1	1	1	3	3	3	3		0	3
75	5	5	1	1	0	0	0	0		0				1					1	3	1	1			2	2	2	3	PROFESIONALES	1	3
76	5	5	1	1	0	0	0	0		3				1	5	5	5	5	1	3	1	1	1	1	4	1	1	3		2	3
78	5	5	1	1	0	0	1	0		0				1	5				1	3	0			1	4					0	2, 3
79	5	5	1	1	0	0	1	1		0				1	5	4	4	4	1	3	1	1	1	1	3	4	2	4		1	3
81	3	5	1	0	0	0	0	0		0				1		5			1	3	1	1	1	1	5			5		0	1
82	5	5	1	1	0	0	0	0		0		1		1	5	5	5	5	1	3	1	1	1	2	5	5	3	3		2	2, 3
84	5	5	1	1	1	1	0	0		0				1	5				1	3	0	1		2	5			5		1	3
87	5	5	1	1	0	0	0	0		0	1	1		1	5	4			1	3	1	1	1	1	3	3	2	2		1	3
93	4	5	1	1	0	0	0	0		0				1	4	4	3	3	1	1	1	1			4	2	2	3		0	2
95	5	5	0	1	1	0	0	0		0				1	4	4			0	1	1	1		2	3	3	3	3		0	3
99	5	5	1	1	0	0	1	0		0				1	5	5	5	5	1	3	1	1			4	3	0	4	MEDICO 5	0	3
102	5	5	1	1	0	0	0	0		0				1	5				1	3	1	1			5					0	3
104	5	5	1	1	0	0	0	0		0				1	5	5			1	3	1	1	1	1	5					0	3
109	5	5	1	1	1	0	1	1		0				1	4	4	4	4	1	3	1	1			4	2	1	4		0	3
110	5	5	1	1	0	0	1	1		0				1	5	5	5	5	1	3	1	1			3	2	1	4		1	3	pag web de sanidad
114	5	5	1	1	0	0	1	0		0				1	4	4	4	4	1	3	1	1	1	1	3	3	3	3		1	3
116	5	5	1	1	0	0	0	0		0	1	1		1	5	5	5	5	1	3	1	1	1	1	2	3	4	5		1	1, 3, 4
117	5	5	1	1	1	0	1	0		2, 4				1			4		1	3	1	1	1	1	4	1	1	2		2	3
TOTAL	66
NO HAN IDO	19
			66											65					66		65		0.722222	0.555556						0.515152	0.909091
SUMA	306	326	62	57	12	2	32	21	0	21	14	14	3	62	246	214	158	154	63	183	56	68	36	54	199	126	85	178	0	48	166
MEDIA	4.63636	4.93939	0.939394	0.863636	0.181818	0.0307692	0.484848	0.318182	#DIV/0!	0.328125	1.07692	0.933333	1.5	0.953846	4.47273	4.45833	3.85366	3.94872	0.954545	2.85938	0.861538	1.23636	1.09091	1.28571	3.37288	2.57143	1.80851	3.35849	#DIV/0!	0.727273	2.96429
MEDIANA	5	5	1	1	0	0	0	0	#NUM!	0	1	1	1.5	1	5	5	4	4	1	3	1	1	1	1	3	3	2	3	#NUM!	1	3
MODA	5	5	1	1	0	0	0	0	#N/A	0	1	1	#N/A	1	5	5	4	5	1	3	1	1	1	1	3	3	1	3	#N/A	1	3
DESV EST	0.572078	0.240435	0.240435	0.345804	0.38865	0.174036	0.5036	0.46934	#DIV/0!	0.943729	0.27735	0.258199	0.707107	0.211451	0.716332	0.742576	1.08538	1.09901	0.209895	0.559682	0.348072	0.543093	0.458505	0.45723	1.12799	1.1726	1.0962	0.982429	#DIV/0!	0.6213	0.424876

## Sheet: HOMRE
GRUPO	P1	P2	P3	P4	P5	P6	P7	P8	P9	P9.1	P10-1	P10-2	P10-3	P10-4	P10-otros	P10.1	P11-T	P11-PW	P11-RS	P11-P	P11.1	P12	P13	P14	P14.1	P15	P15.1	P16	P17-1	P17-2	P17-3	P17-4	P17-5	P17-6	P17-otros	P18	P18.1	P19	P20-PFIZER	P20-MODERNA	P20-AZ	P20-JANSSEN	P21	P21.1-T	P21.1-RS	P21.1-I	P21.1-P	P21.1-PS	P21.1-OTROS
1	55	1	3	pintor	villaverde	1	1	0	0		1	0	0	0			3					4	0	1		1																	1	0	0	0	0	1
2	64	1	6	jubilado	moratalaz	1	1	1	0		1	1	0	0			1	3				4	1, 2	1		1			0	1	0	1	1	0		0		0	2	2	2	2	1	1	1	1	0	0
3	70	1	4	jubilado	portazgo	1	1	0	0		1	1	1	1			3	3	2	4		5	0	1		1			1	1	0	0	1	1		0		1	5				1	1	1	1	1	1
4	65	1	2	jubilado	vallecas	1	1	0	0		1	0	0	0			3	3	3	3			0	1		1			1	1	0	0	0	0		0		0	5	5	5	5	1	1	1	0	1	1
7	73	1	4	jubilado	pueblo nuevo	1	1	1	1	3	0	0	0	0									3	1		1			0	1	0	0	0	0		0		0					1	0	0	0	0	1
8	61	1	5	transporte	las rosas	1	0	0	1	1	1	0	0	0			5					5	3	1		0	1		1	0	0	0	0	0		0		1		5	5		1	1	1	0	0	1
9	56	1	4	AUDIOVISUAL	ARGANDA	1	1	0	0		1	1	0	0		TW, FB, MINIST	4	4	3	4		5	1	1		1			1	1	0	0	0	0		1	CANSANCIO, DOLOR BRAZO	1	5	5	4	5	1	1	1	0	0	1
10	58	1	4	OFICINA	VALLECAS	1	1	0	1	1	1	0	0	1			3	2	2	3		5	1, 2, 4	1		1			1	1	0	0	1	1		0		0	3			3	1	1	0	0	1	1
11	67	1	2	JUBILADO	RIVAS	1	1	0	0		0	1	0	0			5					5	0	1		1			1	1	0	0	0	0		0		0		4	4		1	1	0	1	0	0
13	75	1	5	JUBILADO	CARABANCHEL	1	1	0	0		0	1	1	0	MEDICO		2	2	2	2	4	5	0	1		1			1	1	0	0	1	0	SENTIDO COMUN	0			5	4	4	3	1	1	1	1	0	1
14	58	1	2	PENSIONISTA	VILLAVERDE	1	1	0	0		1	0	0	0			1	1	1	4		5	0	1		1			1	1	0	0	1	0		0		0	4	4	3	5	1	1	0	0	1	1
16	61	1	4	JUBILADO	ENTREVIAS	1	1	0			1	1	0	0			4	2	2	3		5	0	1		1			1	0	0	0	0	0		1	MALEST, FIEBRE	1	4	4	4	4	0	1	0	0	0	0	RADIO
17	74	1	2	JUBILADO	VICALVARO	1	0	0	0		1	0	0	0			5					5		1		1			1	1	0	0	1	0		0		0					0	1	0	0	1	0
20	72	1	6	JUBILADO	SALAMANCA	1	1	0	0		1	1	0	1	PUBLICACIONES MEDICAS		3	4		3	4.5	5	3	1		1			1	0	0	0	1	0		0		1	4	4	3	3	1	1	0	0	0	1
21	58	1	4	EDUCACION	MORATALAZ	1	1	1	1	1	1	0	0	1			3	1	1	3		5	0	1		0	0		0	0	0	0	1	0		1		1	1	1	1	1	0	1	0	0	0	0
22	40	1	3	COMERCIAL	COSLADA	1	1	0	0		1	1	0	1	MEDICOS		3	3	1	4	5	5	0	1		1			1	1	0	0	1	0	SALUD GRUPAL	1	DOLOR BRAZO, FATIGA	1	4	4	4	4	1	1	0	1	1	1
23	47	1	4	AUDIOVISUAL	RIVAS	1	1	0	1	1	0	0	0	1			3	0	0	4		5	3	1		0	1		1	1	0	0	1	0		0		1	4	4.5	2	3	0	0	0	0	0	0
32	61	1	3	SANIDAD	CHAMARTIN	1	1	1	1	1	1	1	0	1			3	3	0	3		5	0	1		1			1	1	1	0	1	1		1	CANSANCIO, DOLOR CABEZA, MALESTAR	1		5			1	1	0	0	0	0
34	58	1	5	AGRICULTOR	PUEBLO	1	1	1	1	1	1	0	0	0			1	1	1	3			3	1		1			1	1	0	0	0	0		0		1					0	0	0	0	0	0
36	56	1	2	EMPLEADO		1	1	0	0		1	0	0	0			4					5	0	1		1			1	1	0	0	1	0		0		0	5				1	0	0	0	0	1
37	69	1	4	JUBILADO	RIVAS	1	1	0	0		1	0	0	1			5			5		5	0	1		1			1	1	0	0	1	0		0		0	5	5	5	5	1	1	0	0	1	1
38	72	1	5	OFICINA	RETIRO	1	1	0	0		1	0	0	1			2			4		5	0	1		1			1	1	0	0	0	1		0		0	4				1	1	0	0	1	1
39	75	1	4	JUBILADO	MORATALAZ	1	1	0	0		1	1	0	1			4	3		4		5	4	1		1			1	1	0	0	1	0		0		1	5				1	1	1	0	1	1
40	69	1	5	JUBILADO	VALDEBERNARDO	1	1	0	0		1	0	0	1			4	4	3	5		5	0	1		1			1	1	0	0	0	0		0		1		4	4		1	1	0	0	1	1
42	72	1	6	JUBILADO	PACIFICO	1	1	0	0		0	0	0	0	CDC USA		2	2	2	2	5	5	0	1		1			1	1	0	0	1	1		0		1	4.5	4.5	3	3.5	1	1	0	0	0	1
45	61	1	5	0	MADRID	1	1	0	1	1	1	1	1	1			3	3	3	3		5	0	1		0	1		1	1	0	0	1	0		1	MALESTAR	1	3	3	3	3	1	0	0	0	0	1
46	63	1	3	JARDINERIA	VALLECAS	1	1	0	1	1	0	1	0	0			1	2	2	2		3	0	1		1			1	1	1	0	0	0		0		0			3		1	0	0	0	0	1
50	52	1	3	IT	COSLADA	1	1	0	0						2		4	2	2	4		5	0	1		0	1		1	1	1	0	1	0		0		0	5	5	5	5	1	0	0	1	1	1
53	42	1	5	TECNICO	SAN FERNANDO DE H	1	1	0	0		0	0	0	1	MEDICOS		2	2	1	3	5	5	0	1		0	1		1	0	0	0	0	0		0		1	4	4	4	4	1	0	0	0	0	1
54	52	1		SEGURIDAD	VALDEMORO	1	1	1	0		0	1	0	0			4	3	3	4		5	1	1		1			1	0	0	0	1	0		0		1	4	4	4	4	1	1	0	1	0	0
55	51	1	5	SECTOR ENERGETICO	TETUAN	1	1	0	1	1	1	1	0	1			3	3	1	4		5	0	1		1			1	1	0	0	1	1		1	REACION ALERGICA, INFLAMACION GANGLIOS	1	5	5	4	3	1	1	0	1	1	1
56	50	1	3	PENSIONISTA	PARQUE AVENIDAS	1	0	0	1	1	1	1	0	0			4	4				4	0	1		0	1		1	1	0	0	0	0		1	MALESTAR, FIEBRE	0	4				1	1	0	1	0	0
57	75	1	2	JUBILADO	ARGANDA	1	0	0	1	1	0	0	0	0	SANITARIOS		1					5	2	1		1			1	1	0	0	0	0		1	FIEBRE	0	5				1	0	0	0	0	1
60	63	1	2	JUBILADO	CUATRO VIENTOS	1	1	0	1		1	0	0	1			3			3			0	1		1			0	1	0	0	0	1		0		1	2		4		1	1	0	0	0	0
62	50	1	3	PENSIONISTA	MORATALAZ	1	1	0	1	1	1	1	0	0			5	3	2	5		5	0	1		1			1	0	0	0	1	0		0		0	3	5	3	3	0	0	0	0	0	0
64	32	1	4	aviacion	rivas	1	0	1	1	2	0	0	0	0			3	4	3	4		5	0	1		1			1	1	0	0	0	0		1	FIEBRE	0	5	5	5	5	1	1	0	1	0	1
65	39	1	3	REPARTIDOR	VALLECAS	1	1	0	0		0	1	1	0		INSTAGRAM	3	3	2	3		5	0	1		0	1		1	1	0	0	0	0		0		1	4	4	4	4	1	1	0	1	0	1
66	48	1	2	CERRAJERO	RIVAS	1	0	0	1	1	1	0	0	0			4					5	0	1		1			1	0	0	0	0	0		0		1	5				1	1	0	0	0	1
67	56	1	4	TRANSPORTE	STA EUGENIA	1	1	0	1		0	1	0	0			3	3	1	3	3	5	0	1		0	1		1	0	0	0	0	1		0		0		5			0	0	0	0	0	0
68	65	1	5	DIRECTOR COMERCIAL	RETIRO	1	1	0	1		0	1	0	0			3	4	2	3		5	0	1		0	1		1	1	0	0	0	0		0		1	4	4	4	4	1	1	0	1	0	0
70	54	1	5	PARADO	PARACUELLOS DEL JARAMA	1	1	0	1	1	0	1	1	1	ASOCIACIONES Y PLATAFORMAS DE AFECTADOS Y PROFESIONALES	TWITTER	2	2	2	3	5	5	0	1		1			1	1	0	0	1	1		1	FIEBRE, DIARREA, DEBILIDAD , DOLOR MUSCULAR Y CABEZA	1	5	5	4	5	1	1	1	1	1	1
74	53	1	4	CONDUCTOR	CIUDAD LINEAL	1	1	0	0		0	1	0	0			3	3	3	3		5	0	1		1			1	1	0	0	1	0		1	DOLOR BRAZO	0	3	3	3	3	1	0	0	1	0	0
75	64	1	5	JUBILADO	VALLECAS	1	1	0	1	1	0	1	0	0			2	3	0	2		5	0	1		1			1	1	0	0	1	1		1	FIEBRE, VOMITOS	0	3	4	3	3	1	0	0	0	0	1
76	55	1	2	MANTENIMIENTO		1	1	0	0		1	0	0	0			2					1	0	1		1			1	1	0	0	0	0		0		0	1	1	4	4	0	1	0	0	0	0
80	80	1	5	JUBILADO	MORATALAZ	1	1	0	0		0	1	0	1			3	4	2	4		3	3, 4	1		1			0	0	0	0	0	1		0		1	3				1	0	0	1	0	0
84	81	1	2	JUBILADO	MORATALAZ	1	1	0	0		1	0	0	1			4			4		5	0	1		1			1	1	0	0	1	0		0		0	5				1	0	0	0	0	0	FAMILIA
86	74	1	4	JUBILADO	IBIZA	1	1	0	1	1	1	0	0	1			2			2			0	1		1			1	0	0	0	0	0		0		0					0	0	0	0	0	0
87	58	1	1	LIMPIEZA	ARGANDA	1	1	0	0		1	0	0	0			2					3	0	1		1			1	1	1	0	0	0		0		0	5				0	0	0	0	0	0
90	53	1	4	ALBAÑIL	COLMENAR DE OREJA	1	0	1	0		1	0	0	0			5
92	62	1	4	CONDUCTOR BUS	NUEVO BAZTAN	1	1	0	0		1	0	0	0			3					5	0	1		0	1		1	1	0	0	0	0		0		1					1	1	0	0	0	0
94	63	1	5	ADMINISTRATIVO	VALLECAS	1	1	0	1	1	1	1	0	0				5				5	0	1		1			1	1	0	0	1	1		1	FIEBRE	1	4	3	1	2	1	1	0	1	0	0
95	54	1	5	ARQUITECTO	moratalaz	1	1	0	0		1	0	0	0			3	3				5	0	1		1			1	1	0	0	0	0		0		1	4	4			1	1	0	0	0	1
99	77	1	5	JUBILADO	RETIRO	1	1	0	0		1	1	0	1			4	3	1	4		5	0	1		1			1	1	0	0	1	0		0		1	5	4	5	4	1	1	0	0	0	0
102	66	1	3	JUBILADO	COSLADA	1	1	0	0		1	0	0	0			5					5	0	1		1			1	1	0	0	0	0		0		0			5		0	0	0	0	0	0
104	59	1	3	MANTENIMIENTO	RIVAS	1	1	0	0		1	0	0	0			5					5	0	1		1			1	1	0	0	0	0		0		0	5	5			1	1	0	0	0	0
110	42	1	4	TELECOMUNICACION	ENTREVIAS	1	1	0	1	1	0	1	0	0			3	2	1	4		5	3	1		1			1	1	0	0	1	1		0		0	5	5	5	4	1	1	0	0	0	1
114	68	1	5	JUBILADO	VALLECAS	1	1	0	0		1	1	0	0			3			3		5	0	1		1			1	1	0	0	0	0		1	DOLOR BRAZO	0	3	3	3	3	1	1	0	1	0	0
116	19	1	3		MADRID	1	1	0	0		0	1	0	0			4	5	6	7		5	0	1		0	1		1	1	0	0	0	0		0		1	4	4	4	4	1	0	0	0	0	0
58	58	58	57	1	0	58	58	58	57	20	57	57	57	57	1	0	56	38	32	40	6	52	53	57	0	57	12	0	56	56	56	56	56	56	0	56	0	55	43	35	36	30	57	57	57	57	57	57	0
SUMA	3467	58	216	0	0	58	51	8	23	23	38	28	5	20	2	0	177	107	60	140	27	247	26	57	0	45	11	0	51	45	4	1	27	13	0	15	0	28	173	141	133	110	46	37	8	17	13	30	0
MEDIA	59.7759	1	3.78947	0	#DIV/0!	1	0.87931	0.137931	0.403509	1.15	0.666667	0.491228	0.0877193	0.350877	2	#DIV/0!	3.16071	2.81579	1.875	3.5	4.5	4.75	0.490566	1	#DIV/0!	0.789474	0.916667	#DIV/0!	0.910714	0.803571	0.0714286	0.0178571	0.482143	0.232143	#DIV/0!	0.267857	#DIV/0!	0.509091	4.02326	4.02857	3.69444	3.66667	0.807018	0.649123	0.140351	0.298246	0.22807	0.526316	#DIV/0!
MEDIANA	61	1	4	0	#NUM!	1	1	0	0	1	1	0	0	0	2	#NUM!	3	3	2	3	5	5	0	1	#NUM!	1	1	#NUM!	1	1	0	0	0	0	#NUM!	0	#NUM!	1	4	4	4	4	1	1	0	0	0	1	#NUM!
DESV EST	12.0584	0	1.23544	#DIV/0!	#DIV/0!	0	0.328611	0.347839	0.494962	0.48936	0.475595	0.504367	0.285401	0.481487	#DIV/0!	#DIV/0!	1.1406	1.08691	1.18458	0.987096	0.83666	0.737643	1.10284	0	#DIV/0!	0.411306	0.288675	#DIV/0!	0.287736	0.400892	0.25987	0.133631	0.504203	0.426021	#DIV/0!	0.44685	#DIV/0!	0.504525	1.1017	1.07062	1.06421	1.02833	0.398147	0.481487	0.350438	0.461555	0.423318	0.503745	#DIV/0!
[truncated: 35 more columns]

## Sheet: MUJER
GRUPO	P1	P2	P3	P4	P5	P6	P7	P8	P9	P9.1	P10-1	P10-2	P10-3	P10-4	P10-otros	P10.1	P11-T	P11-PW	P11-RS	P11-P	P11.1	P12	P13	P14	P14.1	P15	P15.1	P16	P17-1	P17-2	P17-3	P17-4	P17-5	P17-6	P17-otros	P18	P18.1	P19	P20-PFIZER	P20-MODERNA	P20-AZ	P20-JANSSEN	P21	P21.1-T	P21.1-RS	P21.1-I	P21.1-P	P21.1-PS	P21.1-OTROS
79	39	0	4	FERROVIARIO	VALLECAS	1	1	0	1	1	0	1	0	0	FAMILIA		4	4	3	5		5	0	1		0	1		1	1	0	0	1	1		0		0	5	4	4	4	1	1	0	1	0	1
18	41	0	4	ADMINISTRATIVO	ARGANDA	1	1	0	1	1	0	0	0	0	PERSONAL SANITARIO		1	1	1	1	5	5	0	1		1			1	1	0	0	1	0		1	CANSANCIO	0	4	4	4	4	1	0	0	0	0	1
82	44	0	4	PELUQUERIA	LEGANES	1	1	0	0		1	1	0	0			4	4	1	4		5	0	1		0	1		1	1	1	0	1	0		1	FIEBRE, MAL ESTAR	0	5				1	1	0	1	0	0
28	46	0	4	ADMINISTRACION	MORATALAZ	1	0	0	1	1	1	1	0	0			4	3				4	2	1		0	1		1	0	0	0	0	1		1	FIEBRE, MALESTAR	0	3	3	2	2	1	1	0	1	0	0
30	47	0	5	SANITARIO	COSLADA	1	1	0	0		0	0	0	0	TRABAJO		2	1	1	2	4	4	0	1		0	1		0	1	1	0	0	0		1	FIEBRE, DOLOR MUSCULAR	1	4	3	2	2	1	1	0	0	0	1
63	53	0	4	educacion	vallecas	1	1	0	0		1	1	0	0			3	4	3	3		5	0	0	0			1, 2										0					0	0	0	0	0	0
115	53	0	5	EDUCACION	RIVAS	1	1	0	1	1	0	0	0	0	MEDICO		1	1	1	1		5	0	1		0	1		1	1	1	0	0	1		0		1	4	4	4	4	1	0	0	0	0	1
58	54	0	5	ECONOMISTA	MONTECARMELO	1	1	0	0		0	1	1	0		TWITTER	3	2	4	1		5	0	1		1			1	1	0	0	0	0		1	FIEBRE, DOLOR CABEZA	0	5	5	2	3	1	0	0	1	1	0
5	55	0	3	limpieza	pueblo	1	1	0	1	2	0	1	0	0								5	0	1		1			1	0	0	0	0	0		1		0	5				1	1	1	0	0	1
27	55	0	4	CASA	MORATALAZ	1	1	0	0		1	1	0	0			4	4	2	4		5	2	1		1			1	1	0	0	0	1		1		0	4	4	4	4	1	1	0	1	0	0
29	57	0	3	ADMINISTRACION	VALLECAS	1	1	0	0		1	1	0	0			4	5				5	0	1		1			1	1	0	0	0	0		1	CANSACIO, DOLOR BRAZO	0	4	4	4	4	0	0	0	0	0	0
47	57	0	3	LIMPIEZA	VICALVARO	1	1	0	0		1	1	0	0			4		1			5	0	1		1			1	1	0	0	0	1		0		0	4	4			1	1	0	0	0	1
78	58	0	4	SECRETARIADO	MORATALAZ	1	1	1	1	2	0	1	0	0		YOUTUBE	3					3	3	1		1			1	0	0	0	0	0		1	LEVE FIEBRE	0		4			0	0	0	0	0	0
6	59	0	3	teleoperdor	vallecas	1	1	0	1	1	0	0	0	1			2	2	1	3		5	0	1		1			1	1	0	0	1	0		1	FIEBRE, DOLOR MUSC	0	2	2			1	1	0	1	0	0
109	59	0	5	EDUCACION	ADEDLFAS	1	1	0	0		1	1	0	0	FAMILIA Y AMIGOS		4	3		4	2	5	0	1		1			1	1	1	0	1	1		0		0	4	4	4	3	1	1	0	1	1	1
97	60	0	4	JUBILADO	CARABANCHEL	1	1	1	1	1	0	1	0	1			2	3	1	5		3	1, 3	1		1			1	1	0	1	1	1		1	CAIDA DE PELO, DOLOR PIERNAS	0	5				1	1	1	0	1	0
33	65	0	2	LIMPIEZA	VICALVARO	1	1	0	0		1	1	0	0			5	3	3	5		5	0	1		1			1	0	0	0	0	1		0		0	4	4	4	4	1	0	1	0	0	1
71	67	0	5	JUBILADO	RETIRO	1	1	0	0		1	0	0	1			4	4	2	4		4	3	1		1			1	1	0	0	1	1		1	FIEBRE	0	4	4	3	3	1	1	0	1	1	0
93	68	0	5	JUBILADO	QUINTANA	1	1	0	0		1	0	1	0		FACEBOOK	3	3	4	3	3		3	1		1			1	0	0	0	1	0		1	CANSANCIO	1	3	3	2	2	1	0	0	0	0	0
117	68	0	2	CASA	MOSTOLES	1	0	0	1		0	1	0	0			1	4	1	2		4	2, 3	1		1			1	1	0	0	1	0		1	NEUMONIA	1	11	3	4	2	0	0	0	0	0	0
31	69	0	3	OFICINA	SAN DIEGO	1	1	0	0		0	1	0	0			4					5	0	1		1			0	0	0	0	1	0		1	FIEBRE	0		5		5	1	1	0	0	0	0
44	71	0	0	JUBILADO	VALLECAS	1	1	0	0		1	0	0	0			5			5		5	0	1		1			1	1	0	0	1	0		0		1	5	5	5	5	1	0	0	0	0	1
61	72	0	2	0	POZUELO	1	1	0	0		1	0	0	0			3					5	0	1		1			1	1	0	0	1	0		0		1	5				1	1	0	0	0	0
81	76	0	2	CASA	PACIFICO	1	1	0	1	1	1	0	0	0			5					5	0	1		1			1	0	0	0	0	0		0		0	5				1	1	0	0	0	0
41	82	0	5	JUBILADO	0	1	1	0	0		1	0	0	0			3			4		5	1	1		1			1	1	0	0	0	1		0		0	5				1	1	0	0	1	1
72	70	0	5	PENSIONISTA	SALAMANCA	1	1	0	0		1	0	0	1	DIARIO MEDICO		3	1	1	4	5		0	1		1			1	1	0	0	1	1		0		1	4	4	2	2	1	0	0	0	1	1
73	68	0	4	PENSIONISTA	MORATALAZ	1	1	0	1	1	0	0	0	0	HOSPITAL					4		5	0	1		1			0	0	0	1	0	0		1	CANSANCIO	0		5			1	0	0	0	0	1
27	27	27	27	1	1	27	27	27	27	10	27	27	27	27	0	0	25	18	16	19	5	25	25	27	1	26	5	0	26	26	26	26	26	26	0	26	0	27	23	20	15	16	27	27	27	27	27	27	0
SUMA	1613	0	99	0	0	27	25	2	11	12	15	15	2	4	0	0	81	52	30	64	19	117	14	26	0	21	5	0	23	18	4	2	13	11	0	16	0	7	104	78	50	53	23	15	3	8	6	12	0
MEDIA	59.7407	0	3.66667	0	0	1	0.925926	0.0740741	0.407407	1.2	0.555556	0.555556	0.0740741	0.148148	#DIV/0!	#DIV/0!	3.24	2.88889	1.875	3.36842	3.8	4.68	0.56	0.962963	0	0.807692	1	#DIV/0!	0.884615	0.692308	0.153846	0.0769231	0.5	0.423077	#DIV/0!	0.615385	#DIV/0!	0.259259	4.52174	3.9	3.33333	3.3125	0.851852	0.555556	0.111111	0.296296	0.222222	0.444444	#DIV/0!
MEDIANA	59	0	4	0	0	1	1	0	0	1	1	1	0	0	#NUM!	#NUM!	3	3	1	4	4	5	0	1	0	1	1	#NUM!	1	1	0	0	0.5	0	#NUM!	1	#NUM!	0	4	4	4	3.5	1	1	0	0	0	0	#NUM!
DESV EST	10.8861	0	1.27098	#DIV/0!	#DIV/0!	0	0.26688	0.26688	0.500712	0.421637	0.50637	0.50637	0.26688	0.362014	#DIV/0!	#DIV/0!	1.2	1.27827	1.14746	1.38285	1.30384	0.627163	1.08321	0.19245	#DIV/0!	0.401918	0	#DIV/0!	0.325813	0.470679	0.367946	0.271746	0.509902	0.503831	#DIV/0!	0.496139	#DIV/0!	0.446576	1.62003	0.788069	1.04654	1.07819	0.362014	0.50637	0.320256	0.465322	0.423659	0.50637	#DIV/0!









[truncated: 35 more columns]

## Sheet: -=65
GRUPO	P1	P2	P3	P4	P5	P6	P7	P8	P9	P9.1	P10-1	P10-2	P10-3	P10-4	P10-otros	P10.1	P11-T	P11-PW	P11-RS	P11-P	P11.1	P12	P13	P14	P14.1	P15	P15.1	P16	P17-1	P17-2	P17-3	P17-4	P17-5	P17-6	P17-otros	P18	P18.1	P19	P20-PFIZER	P20-MODERNA	P20-AZ	P20-JANSSEN	P21	P21.1-T	P21.1-RS	P21.1-I	P21.1-P	P21.1-PS	P21.1-OTROS
1	55	1	3	pintor	villaverde	1	1	0	0		1	0	0	0			3					4	0	1		1										1							1	0	0	0	0	1
2	64	1	6	jubilado	moratalaz	1	1	1	0		1	1	0	0			1	3				4	1, 2	1		1			0	1	0	1	1	0		0		0	2	2	2	2	1	1	1	1	0	0
5	55	0	3	limpieza	pueblo	1	1	0	1	2	0	1	0	0								5	0	1		1			1	0	0	0	0	0		1		0	5				1	1	1	0	0	1
6	59	0	3	teleoperdor	vallecas	1	1	0	1	1	0	0	0	1			2	2	1	3		5	0	1		1			1	1	0	0	1	0		1	FIEBRE, DOLOR MUSC	0	2	2			1	1	0	1	0	0
8	61	1	5	transporte	las rosas	1	0	0	1	1	1	0	0	0			5					5	3	1		0	1		1	0	0	0	0	0		0		1		5	5		1	1	1	0	0	1
9	56	1	4	AUDIOVISUAL	ARGANDA	1	1	0	0		1	1	0	0		TW, FB, MINIST	4	4	3	4		5	1	1		1			1	1	0	0	0	0		1	CANSANCIO, DOLOR BRAZO	1	5	5	4	5	1	1	1	0	0	1
10	58	1	4	OFICINA	VALLECAS	1	1	0	1	1	1	0	0	1			3	2	2	3		5	1, 2, 4	1		1			1	1	0	0	1	1		0		0	3			3	1	1	0	0	1	1
14	58	1	2	PENSIONISTA	VILLAVERDE	1	1	0	0		1	0	0	0			1	1	1	4		5	0	1		1			1	1	0	0	1	0		0		0	4	4	3	5	1	1	0	0	1	1
16	61	1	4	JUBILADO	ENTREVIAS	1	1	0			1	1	0	0			4	2	2	3		5	0	1		1			1	0	0	0	0	0		1	MALEST, FIEBRE	1	4	4	4	4	0	1	0	0	0	0	RADIO
18	41	0	4	ADMINISTRATIVO	ARGANDA	1	1	0	1	1	0	0	0	0	PERSONAL SANITARIO		1	1	1	1	5	5	0	1		1			1	1	0	0	1	0		1	CANSANCIO	0	4	4	4	4	1	0	0	0	0	1
21	58	1	4	EDUCACION	MORATALAZ	1	1	1	1	1	1	0	0	1			3	1	1	3		5	0	1		0	0		0	0	0	0	1	0		1		1	1	1	1	1	0	1	0	0	0	0
22	40	1	3	COMERCIAL	COSLADA	1	1	0	0		1	1	0	1	MEDICOS		3	3	1	4	5	5	0	1		1			1	1	0	0	1	0	SALUD GRUPAL	1	DOLOR BRAZO, FATIGA	1	4	4	4	4	1	1	0	1	1	1
23	47	1	4	AUDIOVISUAL	RIVAS	1	1	0	1	1	0	0	0	1			3	0	0	4		5	3	1		0	1		1	1	0	0	1	0		0		1	4	4.5	2	3	0	0	0	0	0	0
27	55	0	4	CASA	MORATALAZ	1	1	0	0		1	1	0	0			4	4	2	4		5	2	1		1			1	1	0	0	0	1		1		0	4	4	4	4	1	1	0	1	0	0
28	46	0	4	ADMINISTRACION	MORATALAZ	1	0	0	1	1	1	1	0	0			4	3				4	2	1		0	1		1	0	0	0	0	1		1	FIEBRE, MALESTAR	0	3	3	2	2	1	1	0	1	0	0
29	57	0	3	ADMINISTRACION	VALLECAS	1	1	0	0		1	1	0	0			4	5				5	0	1		1			1	1	0	0	0	0		1	CANSACIO, DOLOR BRAZO	0	4	4	4	4	0	0	0	0	0	0
30	47	0	5	SANITARIO	COSLADA	1	1	0	0		0	0	0	0	TRABAJO		2	1	1	2	4	4	0	1		0	1		0	1	1	0	0	0		1	FIEBRE, DOLOR MUSCULAR	1	4	3	2	2	1	1	0	0	0	1
32	61	1	3	SANIDAD	CHAMARTIN	1	1	1	1	1	1	1	0	1			3	3	0	3		5	0	1		1			1	1	1	0	1	1		1	CANSANCIO, DOLOR CABEZA, MALESTAR	1		5			1	1	0	0	0	0
34	58	1	5	AGRICULTOR	PUEBLO	1	1	1	1	1	1	0	0	0			1	1	1	3			3	1		1			1	1	0	0	0	0		0		1					0	0	0	0	0	0
36	56	1	2	EMPLEADO		1	1	0	0		1	0	0	0			4					5	0	1		1			1	1	0	0	1	0		0		0	5				1	0	0	0	0	1
45	61	1	5	0	MADRID	1	1	0	1	1	1	1	1	1			3	3	3	3		5	0	1		0	1		1	1	0	0	1	0		1	MALESTAR	1	3	3	3	3	1	0	0	0	0	1
46	63	1	3	JARDINERIA	VALLECAS	1	1	0	1	1	0	1	0	0			1	2	2	2		3	0	1		1			1	1	1	0	0	0		0		0			3		1	0	0	0	0	1
47	57	0	3	LIMPIEZA	VICALVARO	1	1	0	0		1	1	0	0			4		1			5	0	1		1			1	1	0	0	0	1		0		0	4	4			1	1	0	0	0	1
50	52	1	3	IT	COSLADA	1	1	0	0						2		4	2	2	4		5	0	1		0	1		1	1	1	0	1	0		0		0	5	5	5	5	1	0	0	1	1	1
53	42	1	5	TECNICO	SAN FERNANDO DE H	1	1	0	0		0	0	0	1	MEDICOS		2	2	1	3	5	5	0	1		0	1		1	0	0	0	0	0		0		1	4	4	4	4	1	0	0	0	0	1
54	52	1		SEGURIDAD	VALDEMORO	1	1	1	0		0	1	0	0			4	3	3	4		5	1	1		1			1	0	0	0	1	0		0		1	4	4	4	4	1	1	0	1	0	0
55	51	1	5	SECTOR ENERGETICO	TETUAN	1	1	0	1	1	1	1	0	1			3	3	1	4		5	0	1		1			1	1	0	0	1	1		1	REACION ALERGICA, INFLAMACION GANGLIOS	1	5	5	4	3	1	1	0	1	1	1
56	50	1	3	PENSIONISTA	PARQUE AVENIDAS	1	0	0	1	1	1	1	0	0			4	4				4	0	1		0	1		1	1	0	0	0	0		1	MALESTAR, FIEBRE	0	4				1	1	0	1	0	0
58	54	0	5	ECONOMISTA	MONTECARMELO	1	1	0	0		0	1	1	0		TWITTER	3	2	4	1		5	0	1		1			1	1	0	0	0	0		1	FIEBRE, DOLOR CABEZA	0	5	5	2	3	1	0	0	1	1	0
60	63	1	2	JUBILADO	CUATRO VIENTOS	1	1	0	1		1	0	0	1			3			3			0	1		1			0	1	0	0	0	1		0		1	2		4		1	1	0	0	0	0
62	50	1	3	PENSIONISTA	MORATALAZ	1	1	0	1	1	1	1	0	0			5	3	2	5		5	0	1		1			1	0	0	0	1	0		0		0	3	5	3	3	0	0	0	0	0	0
63	53	0	4	educacion	vallecas	1	1	0	0		1	1	0	0			3	4	3	3		5	0	0	0			1, 2										0					0	0	0	0	0	0
64	32	1	4	aviacion	rivas	1	0	1	1	2	0	0	0	0			3	4	3	4		5	0	1		1			1	1	0	0	0	0		1	FIEBRE	0	5	5	5	5	1	1	0	1	0	1
65	39	1	3	REPARTIDOR	VALLECAS	1	1	0	0		0	1	1	0		INSTAGRAM	3	3	2	3		5	0	1		0	1		1	1	0	0	0	0		0		1	4	4	4	4	1	1	0	1	0	1
66	48	1	2	CERRAJERO	RIVAS	1	0	0	1	1	1	0	0	0			4					5	0	1		1			1	0	0	0	0	0		0		1	5				1	1	0	0	0	1
67	56	1	4	TRANSPORTE	STA EUGENIA	1	1	0	1		0	1	0	0			3	3	1	3	3	5	0	1		0	1		1	0	0	0	0	1		0		0		5			0	0	0	0	0	0
70	54	1	5	PARADO	PARACUELLOS DEL JARAMA	1	1	0	1	1	0	1	1	1	ASOCIACIONES Y PLATAFORMAS DE AFECTADOS Y PROFESIONALES	TWITTER	2	2	2	3	5	5	0	1		1			1	1	0	0	1	1		1	FIEBRE, DIARREA, DEBILIDAD , DOLOR MUSCULAR Y CABEZA	1	5	5	4	5	1	1	1	1	1	1
74	53	1	4	CONDUCTOR	CIUDAD LINEAL	1	1	0	0		0	1	0	0			3	3	3	3		5	0	1		1			1	1	0	0	1	0		1	DOLOR BRAZO	0	3	3	3	3	1	0	0	1	0	0
75	64	1	5	JUBILADO	VALLECAS	1	1	0	1	1	0	1	0	0			2	3	0	2		5	0	1		1			1	1	0	0	1	1		1	FIEBRE, VOMITOS	0	3	4	3	3	1	0	0	0	0	1
76	55	1	2	MANTENIMIENTO		1	1	0	0		1	0	0	0			2					1	0	1		1			1	1	0	0	0	0		0		0	1	1	4	4	0	1	0	0	0	0
78	58	0	4	SECRETARIADO	MORATALAZ	1	1	1	1	2	0	1	0	0		YOUTUBE	3					3	3	1		1			1	0	0	0	0	0		1	LEVE FIEBRE	0		4			0	0	0	0	0	0
79	39	0	4	FERROVIARIO	VALLECAS	1	1	0	1	1	0	1	0	0	FAMILIA		4	4	3	5		5	0	1		0	1		1	1	0	0	1	1		0		0	5	4	4	4	1	1	0	1	0	1
82	44	0	4	PELUQUERIA	LEGANES	1	1	0	0		1	1	0	0			4	4	1	4		5	0	1		0	1		1	1	1	0	1	0		1	FIEBRE, MAL ESTAR	0	5				1	1	0	1	0	0
87	58	1	1	LIMPIEZA	ARGANDA	1	1	0	0		1	0	0	0			2					3	0	1		1			1	1	1	0	0	0		0		0	5				0	0	0	0	0	0
92	62	1	4	CONDUCTOR BUS	NUEVO BAZTAN	1	1	0	0		1	0	0	0			3					5	0	1		0	1		1	1	0	0	0	0		0		1					1	1	0	0	0	0
94	63	1	5	ADMINISTRATIVO	VALLECAS	1	1	0	1	1	1	1	0	0				5				5	0	1		1			1	1	0	0	1	1		1	FIEBRE	1	4	3	1	2	1	1	0	1	0	0
95	54	1	5	ARQUITECTO	moratalaz	1	1	0	0		1	0	0	0			3	3				5	0	1		1			1	1	0	0	0	0		0		1	4	4			1	1	0	0	0	1
97	60	0	4	JUBILADO	CARABANCHEL	1	1	1	1	1	0	1	0	1			2	3	1	5		3	1, 3	1		1			1	1	0	1	1	1		1	CAIDA DE PELO, DOLOR PIERNAS	0	5				1	1	1	0	1	0
104	59	1	3	MANTENIMIENTO	RIVAS	1	1	0	0		1	0	0	0			5					5	0	1		1			1	1	0	0	0	0		0		0	5	5			1	1	0	0	0	0
109	59	0	5	EDUCACION	ADEDLFAS	1	1	0	0		1	1	0	0	FAMILIA Y AMIGOS		4	3		4	2	5	0	1		1			1	1	1	0	1	1		0		0	4	4	4	3	1	1	0	1	1	1
110	42	1	4	TELECOMUNICACION	ENTREVIAS	1	1	0	1	1	0	1	0	0			3	2	1	4		5	3	1		1			1	1	0	0	1	1		0		0	5	5	5	4	1	1	0	0	0	1
115	53	0	5	EDUCACION	RIVAS	1	1	0	1	1	0	0	0	0	MEDICO		1	1	1	1		5	0	1		0	1		1	1	1	0	0	1		0		1	4	4	4	4	1	0	0	0	0	1
116	19	1	3		MADRID	1	1	0	0		0	1	0	0			4	5	6	7		5	0	1		0	1		1	1	0	0	0	0		0		1	4	4	4	4	1	0	0	0	0	0
90	53	1	4	ALBAÑIL	COLMENAR DE OREJA	1	0	1	0		1	0	0	0			5						3	1												0
54	54	54	53	1	0	54	54	54	53	25	53	53	53	53	1	0	52	41	35	36	7	51	51	54	1	52	16	0	51	51	51	51	51	51	0	53	0	52	44	38	34	32	53	53	53	53	53	53	0
SUMA	2865	38	200	0	0	54	48	9	27	28	32	31	4	12	2	0	159	112	62	121	29	238	24	53	0	36	15	0	47	40	8	2	24	16	0	25	0	22	173	149	118	113	42	33	6	18	9	26	0
MEDIA	53.0556	0.703704	3.77358	0	#DIV/0!	1	0.888889	0.166667	0.509434	1.12	0.603774	0.584906	0.0754717	0.226415	2	#DIV/0!	3.05769	2.73171	1.77143	3.36111	4.14286	4.66667	0.470588	0.981481	0	0.692308	0.9375	#DIV/0!	0.921569	0.784314	0.156863	0.0392157	0.470588	0.313725	#DIV/0!	0.471698	#DIV/0!	0.423077	3.93182	3.92105	3.47059	3.53125	0.792453	0.622642	0.113208	0.339623	0.169811	0.490566	#DIV/0!
MEDIANA	55	1	4	0	#NUM!	1	1	0	1	1	1	1	0	0	2	#NUM!	3	3	1	3	5	5	0	1	0	1	1	#NUM!	1	1	0	0	0	0	#NUM!	0	#NUM!	0	4	4	4	4	1	1	0	0	0	0	#NUM!
DESV EST	8.7511	0.460911	1.04957	#DIV/0!	#DIV/0!	0	0.317221	0.376177	0.504695	0.331662	0.493793	0.497454	0.266679	0.422516	#DIV/0!	#DIV/0!	1.10991	1.20467	1.23873	1.19888	1.21499	0.791623	1.0267	0.136083	#DIV/0!	0.466041	0.25	#DIV/0!	0.271524	0.41539	0.36729	0.196039	0.504101	0.468623	#DIV/0!	0.503975	#DIV/0!	0.498867	1.08687	1.07506	1.07971	1.0155	0.409432	0.489364	0.319878	0.478113	0.37906	0.504695	#DIV/0!


















[truncated: 37 more columns]

## Sheet: +65
GRUPO	P1	P2	P3	P4	P5	P6	P7	P8	P9	P9.1	P10-1	P10-2	P10-3	P10-4	P10-otros	P10.1	P11-T	P11-PW	P11-RS	P11-P	P11.1	P12	P13	P14	P14.1	P15	P15.1	P16	P17-1	P17-2	P17-3	P17-4	P17-5	P17-6	P17-otros	P18	P18.1	P19	P20-PFIZER	P20-MODERNA	P20-AZ	P20-JANSSEN	P21	P21.1-T	P21.1-RS	P21.1-I	P21.1-P	P21.1-PS	P21.1-OTROS
3	70	1	4	jubilado	portazgo	1	1	0	0		1	1	1	1			3	3	2	4		5	0	1		1			1	1	0	0	1	0		0		1	5	5	5	5	1	0	0	0	0	1
4	65	1	2	jubilado	vallecas	1	1	0	0		1	0	0	0			3	3	3	3			0	1		1			1	1	0	0	0	0		0		0	5	5	5	5	1	1	1	0	1	1
7	73	1	4	jubilado	pueblo nuevo	1	1	1	1	3	0	0	0	0									3	1		1			1	1	0	0	1	0		0		0					0	1	0	0	1	0
11	67	1	2	JUBILADO	RIVAS	1	1	0	0		0	1	0	0			5					5	0	1		1			1	1	0	0	1	1		1	FIEBRE	0	4	4	3	3	1	1	0	1	1	0
13	75	1	5	JUBILADO	CARABANCHEL	1	1	0	0		0	1	1	0	MEDICO		2	2	2	2	4	5	0	1		1			1	1	0	0	0	0		1	FIEBRE	0	5				1	0	0	0	0	1
17	74	1	2	JUBILADO	VICALVARO	1	0	0	0		1	0	0	0			5					5		1		1			1	0	0	0	0	0		0		0					0	0	0	0	0	0
20	72	1	6	JUBILADO	SALAMANCA	1	1	0	0		1	1	0	1	PUBLICACIONES MEDICAS		3	4		3	4.5	5	3	1		1			1	1	0	0	0	1		0		0	4				1	1	0	0	1	1
31	69	0	3	OFICINA	SAN DIEGO	1	1	0	0		0	1	0	0			4					5	0	1		1			1	1	0	0	1	0		0		0	5	5	5	5	1	1	0	0	1	1
33	65	0	2	LIMPIEZA	VICALVARO	1	1	0	0		1	1	0	0			5	3	3	5		5	0	1		1			1	0	0	0	0	1		0		0	4	4	4	4	1	0	1	0	0	1
37	69	1	4	JUBILADO	RIVAS	1	1	0	0		1	0	0	1			5			5		5	0	1		1			1	1	0	0	0	0		0		1		4	4		1	1	0	0	1	1
38	72	1	5	OFICINA	RETIRO	1	1	0	0		1	0	0	1			2			4		5	0	1		1			1	1	0	0	1	1		0		1	4.5	4.5	3	3.5	1	1	0	0	0	1
39	75	1	4		MORATALAZ	1	1	0	0		1	1	0	1			4	3		4		5	4	1		1			1	1	0	0	1	0	SENTIDO COMUN	0			5	4	4	3	1	1	1	1	0	1
40	69	1	5	JUBILADO	VALDEBERNARDO	1	1	0	0		1	0	0	1			4	4	3	5		5	0	1		1			1	1	0	0	1	1		0		1	5				1	1	1	1	1	1
41	82	0	5	JUBILADO	0	1	1	0	0		1	0	0	0			3			4		5	1	1		1			0	0	0	1	0	0		1	CANSANCIO	0		5			1	0	0	0	0	1
42	72	1	6	JUBILADO	PACIFICO	1	1	0	0		0	0	0	0	CDC USA		2	2	2	2	5	5	0	1		1			1	1	0	0	1	0		0		1	5				1	1	0	0	0	0
44	71	0	0	JUBILADO	VALLECAS	1	1	0	0		1	0	0	0			5			5		5	0	1		1			1	0	0	0	1	0		0		1	4	4	3	3	1	1	0	0	0	1
57	75	1	2	JUBILADO	ARGANDA	1	0	0	1	1	0	0	0	0	SANITARIOS		1					5	2	1		1			1	0	0	0	0	0		0		0	5				1	1	0	0	0	0
61	72	0	2	0	POZUELO	1	1	0	0		1	0	0	0			3					5	0	1		1			0	1	0	0	0	0		0		0					1	0	0	0	0	1
68	65	1	5	DIRECTOR COMERCIAL	RETIRO	1	1	0	1		0	1	0	0			3	4	2	3		5	0	1		0	1		1	1	0	0	0	0		0		1	4	4	4	4	1	1	0	1	0	0
71	67	0	5	JUBILADO	RETIRO	1	1	0	0		1	0	0	1			4	4	2	4		4	3	1		1			1	0	0	0	1	0		1	CANSANCIO	1	3	3	2	2	1	0	0	0	0	0
80	80	1	5	JUBILADO	MORATALAZ	1	1	0	0		0	1	0	1			3	4	2	4		3	3, 4	1		1			1	1	0	0	1	0		0		0	5				1	0	0	0	0	0	FAMILIA
81	76	0	2	CASA	PACIFICO	1	1	0	1	1	1	0	0	0			5					5	0	1		1			1	1	0	0	1	0		0		1	5	4	5	4	1	1	0	0	0	0
84	81	1	2	JUBILADO	MORATALAZ	1	1	0	0		1	0	0	1			4			4		5	0	1		1			1	1	0	0	0	1		0		0	5				1	1	0	0	1	1
86	74	1	4	JUBILADO	IBIZA	1	1	0	1	1	1	0	0	1			2			2			0	1		1			1	1	0	0	1	0		0		1	5				1	1	1	0	1	1
93	68	0	5	JUBILADO	QUINTANA	1	1	0	0		1	0	1	0		FACEBOOK	3	3	4	3	3		3	1		1			1	1	0	0	0	0		1	DOLOR BRAZO	0	3	3	3	3	1	1	0	1	0	0
99	77	1	5	JUBILADO	RETIRO	1	1	0	0		1	1	0	1			4	3	1	4		5	0	1		1			0	0	0	0	0	1		0		1	3				1	0	0	1	0	0
102	66	1	3	JUBILADO	COSLADA	1	1	0	0		1	0	0	0			5					5	0	1		1			1	1	0	0	0	0		0		0		4	4		1	1	0	1	0	0
114	68	1	5	JUBILADO	VALLECAS	1	1	0	0		1	1	0	0			3			3		5	0	1		1			1	1	0	0	1	0		1	NEUMONIA	1	11	3	4	2	0	0	0	0	0	0
117	68	0	2	CASA	MOSTOLES	1	0	0	1		0	1	0	0			1	4	1	2		4	2, 3	1		1			0	0	0	0	1	0		1	FIEBRE	0		5		5	1	1	0	0	0	0
72	70	0	5	PENSIONISTA	SALAMANCA	1	1	0	0		1	0	0	1	DIARIO MEDICO		3	1	1	4	5		1	1		1			1	1	0	0	1	1		0		1	4	4	2	2	1	0	0	0	1	1
73	68	0	4	PENSIONISTA	MORATALAZ	1	1	0	1	1	0	0	0	0	HOSPITAL					4		5	1	1		1			0	0	0	1	0	0		1	CANSANCIO	0		5			1	0	0	0	0	1
31	31	31	31	1	1	31	31	31	31	5	31	31	31	31	0	0	29	15	13	23	4	26	28	31	0	31	1	0	31	31	31	31	31	31	0	31	0	30	22	18	16	14	31	31	31	31	31	31	0
SUMA	2215	20	115	0	0	31	28	1	7	7	21	12	3	12	0	0	99	47	28	83	17	126	21	31	0	30	1	0	26	22	0	2	16	8	0	8	0	13	104	75	60	50	28	19	5	7	10	17	0
MEDIA	71.4516	0.645161	3.70968	0	0	1	0.903226	0.0322581	0.225806	1.4	0.677419	0.387097	0.0967742	0.387097	#DIV/0!	#DIV/0!	3.41379	3.13333	2.15385	3.6087	4.25	4.84615	0.75	1	#DIV/0!	0.967742	1	#DIV/0!	0.83871	0.709677	0	0.0645161	0.516129	0.258065	#DIV/0!	0.258065	#DIV/0!	0.433333	4.72727	4.16667	3.75	3.57143	0.903226	0.612903	0.16129	0.225806	0.322581	0.548387	#DIV/0!
MEDIANA	71	1	4	0	0	1	1	0	0	1	1	0	0	0	#NUM!	#NUM!	3	3	2	4	4.5	5	0	1	#NUM!	1	1	#NUM!	1	1	0	0	1	0	#NUM!	0	#NUM!	0	5	4	4	3.5	1	1	0	0	0	1	#NUM!
DESV EST	4.63924	0.486373	1.53174	#DIV/0!	#DIV/0!	0	0.300537	0.179605	0.425024	0.894427	0.475191	0.495138	0.300537	0.495138	#DIV/0!	#DIV/0!	1.21059	0.915475	0.898717	0.988071	0.957427	0.464095	1.26564	0	#DIV/0!	0.179605	#DIV/0!	#DIV/0!	0.373878	0.461414	0	0.249731	0.508001	0.444803	#DIV/0!	0.444803	#DIV/0!	0.504007	1.57908	0.707107	1	1.15787	0.300537	0.495138	0.373878	0.425024	0.475191	0.505879	#DIV/0!
[truncated: 35 more columns]

## Sheet: p-valor
GRUPO	P1	P2	P3	P4	P5	P6	P7	P8	P9	P9.1	P10-1	P10-2	P10-3	P10-4	P10-otros	P10.1	P11-T	P11-PW	P11-RS	P11-P	P11.1	P12	P13-1	p13-2	p13-3	p13-4	p13-5	p13-0	P14	P14.1	P15	P15.1	P16	P17-1	P17-2	P17-3	P17-4	P17-5	P17-6	P17-otros	P18	P18.1	P19	P20-PFIZER	P20-MODERNA	P20-AZ	P20-JANSSEN	P21	P21.1-T
1	55	1	3	pintor	villaverde	1	1	0	0		1	0	0	0			3					4	0	0	0	0	0	1	1		1												0					1
2	64	1	6	jubilado	moratalaz	1	1	1	0		1	1	0	0			1	3				4	1	1	0	0	0	0	1		1			0	1	0	1	1	0		0		0	2	2	2	2	1	1
3	70	1	4	jubilado	portazgo	1	1	0	0		1	1	1	1			3	3	2	4		5	0	0	0	0	0	1	1		1			1	1	0	0	1	1		0		1	5				1	1
4	65	1	2	jubilado	vallecas	1	1	0	0		1	0	0	0			3	3	3	3			0	0	0	0	0	1	1		1			1	1	0	0	0	0		0		0	5	5	5	5	1	1
5	55	0	3	limpieza	pueblo	1	1	0	1	2	0	1	0	0								5	0	0	0	0	0	1	1		1			1	0	0	0	0	0		1		0	5				1	1
6	59	0	3	teleoperdor	vallecas	1	1	0	1	1	0	0	0	1			2	2	1	3		5	0	0	0	0	0	1	1		1			1	1	0	0	1	0		1	FIEBRE, DOLOR MUSC	0	2	2			1	1
8	61	1	5	transporte	las rosas	1	0	0	1	1	1	0	0	0			5					5	0	0	1	0	0	0	1		0	1		1	0	0	0	0	0		0		1		5	5		1	1
9	56	1	4	AUDIOVISUAL	ARGANDA	1	1	0	0		1	1	0	0		TW, FB, MINIST	4	4	3	4		5	1	0	0	0	0	0	1		1			1	1	0	0	0	0		1	CANSANCIO, DOLOR BRAZO	1	5	5	4	5	1	1
10	58	1	4	OFICINA	VALLECAS	1	1	0	1	1	1	0	0	1			3	2	2	3		5	1	1	0	1	0	0	1		1			1	1	0	0	1	1		0		0	3			3	1	1
11	67	1	2	JUBILADO	RIVAS	1	1	0	0		0	1	0	0			5					5	0	0	0	0	0	1	1		1			1	1	0	0	0	0		0		0		4	4		1	1
13	75	1	5	JUBILADO	CARABANCHEL	1	1	0	0		0	1	1	0	MEDICO		2	2	2	2	4	5	0	0	0	0	0	1	1		1			1	1	0	0	1	0	SENTIDO COMUN	0		0	5	4	4	3	1	1
14	58	1	2	PENSIONISTA	VILLAVERDE	1	1	0	0		1	0	0	0			1	1	1	4		5	0	0	0	0	0	1	1		1			1	1	0	0	1	0		0		0	4	4	3	5	1	1
16	61	1	4	JUBILADO	ENTREVIAS	1	1	0			1	1	0	0			4	2	2	3		5	0	0	0	0	0	1	1		1			1	0	0	0	0	0		1	MALEST, FIEBRE	1	4	4	4	4	0	1
17	74	1	2	JUBILADO	VICALVARO	1	0	0	0		1	0	0	0			5					5	0	0	1	0	0	0	1		1			1	1	0	0	1	0		0		0					0	1
18	41	0	4	ADMINISTRATIVO	ARGANDA	1	1	0	1	1	0	0	0	0	PERSONAL SANITARIO		1	1	1	1	5	5	0	0	0	0	0	1	1		1			1	1	0	0	1	0		1	CANSANCIO	0	4	4	4	4	1	0
20	72	1	6	JUBILADO	SALAMANCA	1	1	0	0		1	1	0	1	PUBLICACIONES MEDICAS		3	4		3	4.5	5	0	0	1	0	0	0	1		1			1	0	0	0	1	0		0		1	4	4	3	3	1	1
21	58	1	4	EDUCACION	MORATALAZ	1	1	1	1	1	1	0	0	1			3	1	1	3		5	0	0	0	0	0	1	1		0	0		0	0	0	0	1	0		1		1	1	1	1	1	0	1
22	40	1	3	COMERCIAL	COSLADA	1	1	0	0		1	1	0	1	MEDICOS		3	3	1	4	5	5	0	0	0	0	0	1	1		1			1	1	0	0	1	0	SALUD GRUPAL	1	DOLOR BRAZO, FATIGA	1	4	4	4	4	1	1
27	55	0	4	CASA	MORATALAZ	1	1	0	0		1	1	0	0			4	4	2	4		5	0	1	0	0	0	0	1		1			1	1	0	0	0	1		1		0	4	4	4	4	1	1
29	57	0	3	ADMINISTRACION	VALLECAS	1	1	0	0		1	1	0	0			4	5				5	0	0	0	0	0	1	1		1			1	1	0	0	0	0		1	CANSACIO, DOLOR BRAZO	0	4	4	4	4	0
31	69	0	3	OFICINA	SAN DIEGO	1	1	0	0		0	1	0	0			4					5	0	0	0	0	0	1	1		1			0	0	0	0	1	0		1	FIEBRE	0		5		5	1	1
32	61	1	3	SANIDAD	CHAMARTIN	1	1	1	1	1	1	1	0	1			3	3	0	3		5	0	0	0	0	0	1	1		1			1	1	1	0	1	1		1	CANSANCIO, DOLOR CABEZA, MALESTAR	1		5			1	5
36	56	1	2	EMPLEADO		1	1	0	0		1	0	0	0			4					5	0	0	0	0	0	1	1		1			1	1	0	0	1	0		0		0	5				1
37	69	1	4	JUBILADO	RIVAS	1	1	0	0		1	0	0	1			5			5		5	0	0	0	0	0	1	1		1			1	1	0	0	1	0		0		0	5	5	5	5	1	1
38	72	1	5	OFICINA	RETIRO	1	1	0	0		1	0	0	1			2			4		5	0	0	0	0	0	1	1		1			1	1	0	0	0	1		0		0	4				1	1
39	75	1	4	JUBILADO	MORATALAZ	1	1	0	0		1	1	0	1			4	3		4		5	0	0	1	1	0	0	1		1			1	1	0	0	1	0		0		1	5				1	1
40	69	1	5	JUBILADO	VALDEBERNARDO	1	1	0	0		1	0	0	1			4	4	3	5		5	0	0	0	0	0	1	1		1			1	1	0	0	0	0		0		1		4	4		1	1
41	82	0	5	JUBILADO	0	1	1	0	0		1	0	0	0			3			4		5	1	0	0	0	0	0	1		1			1	1	0	0	0	1		0		0	5				1	1
42	72	1	6	JUBILADO	PACIFICO	1	1	0	0		0	0	0	0	CDC USA		2	2	2	2	5	5	0	0	0	0	0	1	1		1			1	1	0	0	1	1		0		1	4	4.5	3	3.5	1	1
44	71	0	0	JUBILADO	VALLECAS	1	1	0	0		1	0	0	0			5			5		5	0	0	0	0	0	1	1		1			1	1	0	0	1	0		0		1	5	5	5	5	1
45	61	1	5	0	MADRID	1	1	0	1	1	1	1	1	1			3	3	3	3		5	0	0	0	0	0	1	1		0	1		1	1	0	0	1	0		1	MALESTAR	1	3	3	3	3	1
46	63	1	3	JARDINERIA	VALLECAS	1	1	0	1	1	0	1	0	0			1	2	2	2		3	0	0	0	0	0	1	1		1			1	1	1	0	0	0		0		0			3		1
47	57	0	3	LIMPIEZA	VICALVARO	1	1	0	0		1	1	0	0			4		1			5	0	0	0	0	0	1	1		1			1	1	0	0	0	1		0		0	4	4			1	1
53	42	1	5	TECNICO	SAN FERNANDO DE H	1	1	0	0		0	0	0	1	MEDICOS		2	2	1	3	5	5	0	0	0	0	0	1	1		0	1		1	0	0	0	0	0		0		1	4	4	4	4	1
54	52	1		SEGURIDAD	VALDEMORO	1	1	1	0		0	1	0	0			4	3	3	4		5	1	0	0	0	0	0	1		1			1	0	0	0	1	0		0		1	4	4	4	4	1	1
55	51	1	5	SECTOR ENERGETICO	TETUAN	1	1	0	1	1	1	1	0	1			3	3	1	4		5	0	0	0	0	0	1	1		1			1	1	0	0	1	1		1	REACION ALERGICA, INFLAMACION GANGLIOS	1	5	5	4	3	1	1
58	54	0	5	ECONOMISTA	MONTECARMELO	1	1	0	0		0	1	1	0		TWITTER	3	2	4	1		5	0	0	0	0	0	1	1		1			1	1	0	0	0	0		1	FIEBRE, DOLOR CABEZA	0	5	5	2	3	1
60	63	1	2	JUBILADO	CUATRO VIENTOS	1	1	0	1		1	0	0	1			3			3			0	0	0	0	0	1	1		1			0	1	0	0	0	1		0		1	2		4		1	1
61	72	0	2	0	POZUELO	1	1	0	0		1	0	0	0			3					5	0	0	0	0	0	1	1		1			1	1	0	0	1	0		0		1	5				1	1
62	50	1	3	PENSIONISTA	MORATALAZ	1	1	0	1	1	1	1	0	0			5	3	2	5		5	0	0	0	0	0	1	1		1			1	0	0	0	1	0		0		0	3	5	3	3	0
63	53	0	4	educacion	vallecas	1	1	0	0		1	1	0	0			3	4	3	3		5	0	0	0	0	0	1	0	0			1, 2										0					0
64	32	1	4	aviacion	rivas	1	0	1	1	2	0	0	0	0			3	4	3	4		5	0	0	0	0	0	1	1		1			1	1	0	0	0	0		1	FIEBRE	0	5	5	5	5	1	1
65	39	1	3	REPARTIDOR	VALLECAS	1	1	0	0		0	1	1	0		INSTAGRAM	3	3	2	3		5	0	0	0	0	0	1	1		0	1		1	1	0	0	0	0		0		1	4	4	4	4	1	1
68	65	1	5	DIRECTOR COMERCIAL	RETIRO	1	1	0	1		0	1	0	0			3	4	2	3		5	0	0	0	0	0	1	1		0	1		1	1	0	0	0	0		0		1	4	4	4	4	1	1
70	54	1	5	PARADO	PARACUELLOS DEL JARAMA	1	1	0	1	1	0	1	1	1	ASOCIACIONES Y PLATAFORMAS DE AFECTADOS Y PROFESIONALES	TWITTER	2	2	2	3	5	5	0	0	0	0	0	1	1		1			1	1	0	0	1	1		1	FIEBRE, DIARREA, DEBILIDAD , DOLOR MUSCULAR Y CABEZA	1	5	5	4	5	1	1
71	67	0	5	JUBILADO	RETIRO	1	1	0	0		1	0	0	1			4	4	2	4		4	0	0	1	1	0	0	1		1			1	1	0	0	1	1		1	FIEBRE	0	4	4	3	3	1	1
73		0	4	PENSIONISTA	MORATALAZ	1	1	0	1	1	0	0	0	0	HOSPITAL					4		5	0	0	0	0	0	1	1		1			0	0	0	1	0	0		1	CANSANCIO	0		5			1	0
74	53	1	4	CONDUCTOR	CIUDAD LINEAL	1	1	0	0		0	1	0	0			3	3	3	3		5	0	0	0	0	0	1	1		1			1	1	0	0	1	0		1	DOLOR BRAZO	0	3	3	3	3	1	0
75	64	1	5	JUBILADO	VALLECAS	1	1	0	1	1	0	1	0	0			2	3	0	2		5	0	0	0	0	0	1	1		1			1	1	0	0	1	1		1	FIEBRE, VOMITOS	0	3	4	3	3	1	0
76	55	1	2	MANTENIMIENTO		1	1	0	0		1	0	0	0			2					1	0	0	0	0	0	1	1		1			1	1	0	0	0	0		0		0	1	1	4	4	0	1
78	58	0	4	SECRETARIADO	MORATALAZ	1	1	1	1	2	0	1	0	0		YOUTUBE	3					3	0	0	1	0	0	0	1		1			1	0	0	0	0	0		1	LEVE FIEBRE	0		4			0
79	39	0	4	FERROVIARIO	VALLECAS	1	1	0	1	1	0	1	0	0	FAMILIA		4	4	3	5		5	0	0	0	0	0	1	1		0	1		1	1	0	0	1	1		0		0	5	4	4	4	1	1
81	76	0	2	CASA	PACIFICO	1	1	0	1	1	1	0	0	0			5					5	0	0	0	0	0	1	1		1			1	0	0	0	0	0		0		0	5				1	1
82	44	0	4	PELUQUERIA	LEGANES	1	1	0	0		1	1	0	0			4	4	1	4		5	0	0	0	0	0	1	1		0	1		1	1	1	0	1	0		1	FIEBRE, MAL ESTAR	0	5				1	1
84	81	1	2	JUBILADO	MORATALAZ	1	1	0	0		1	0	0	1			4			4		5	0	0	0	0	0	1	1		1			1	1	0	0	1	0		0		0	5				1
87	58	1	1	LIMPIEZA	ARGANDA	1	1	0	0		1	0	0	0			2					3	0	0	0	0	0	1	1		1			1	1	1	0	0	0		0		0	5				0
93	68	0	5	JUBILADO	QUINTANA	1	1	0	0		1	0	1	0		FACEBOOK	3	3	4	3	3		0	0	1	0	0	0	1		1			1	0	0	0	1	0		1	CANSANCIO	1	3	3	2	2	1
95	54	1	5	ARQUITECTO	moratalaz	1	1	0	0		1	0	0	0			3	3				5	0	0	0	0	0	1	1		1			1	1	0	0	0	0		0		1	4	4			1	1
99	77	1	5	JUBILADO	RETIRO	1	1	0	0		1	1	0	1			4	3	1	4		5	0	0	0	0	0	1	1		1			1	1	0	0	1	0		0		1	5	4	5	4	1	1
102	66	1	3	JUBILADO	COSLADA	1	1	0	0		1	0	0	0			5					5	0	0	0	0	0	1	1		1			1	1	0	0	0	0		0		0			5		0
104	59	1	3	MANTENIMIENTO	RIVAS	1	1	0	0		1	0	0	0			5					5	0	0	0	0	0	1	1		1			1	1	0	0	0	0		0		0	5	5			1	1
109	59	0	5	EDUCACION	ADEDLFAS	1	1	0	0		1	1	0	0	FAMILIA Y AMIGOS		4	3		4	2	5	0	0	0	0	0	1	1		1			1	1	1	0	1	1		0		0	4	4	4	3	1	1
110	42	1	4	TELECOMUNICACION	ENTREVIAS	1	1	0	1	1	0	1	0	0			3	2	1	4		5	0	0	1	0	0	0	1		1			1	1	0	0	1	1		0		0	5	5	5	4	1	1
114	68	1	5	JUBILADO	VALLECAS	1	1	0	0		1	1	0	0			3			3		5	0	0	0	0	0	1	1		1			1	1	0	0	0	0		1	DOLOR BRAZO	0	3	3	3	3	1	1
116	19	1	3		MADRID	1	1	0	0		0	1	0	0			4	5	6	7		5	0	0	0	0	0	1	1		0	1		1	1	0	0	0	0		0		1	4	4	4	4	1
117	68	0	2	CASA	MOSTOLES	1	0	0	1		0	1	0	0			1	4	1	2		4	0	1	1	0	0	0	1		1			1	1	0	0	1	0		1	NEUMONIA	1	1	3	4	2	0
	65
TOTAL	66
OFRECIDO	117
RECHAZADO	32
		27																		48	8	63	66	66	66	66	66	66	66	1	65	9	0	64	64	64	64	64	64	0	64	0	66	54	47	43	38	66	49
SUMA	3880	45	241	0	0	66	62	6	22	22	43	36	7	19	0	0	208	128	77	167	34	301	5	4	9	3	0	51	65	0	56	8	0	59	51	5	2	35	16	0	25	0	26	217	188	161	139	55	49
							1.15152	0.0909091	0.338462		0.651515	0.545455	0.106061	0.287879																													66					16
MEDIA	59.6923	0.681818	3.70769	0	0	1	0.939394	0.0909091	0.338462	1.15789	0.651515	0.545455	0.106061	0.287879	#DIV/0!	#DIV/0!	3.25	2.97674	2.02632	3.47917	4.25	4.77778	0.0757576	0.0606061	0.136364	0.0454545	0	0.772727	0.984848	0	0.861538	0.888889	#DIV/0!	0.921875	0.796875	0.078125	0.03125	0.546875	0.25	#DIV/0!	0.390625	#DIV/0!	0.393939	4.01852	4	3.74419	3.65789	0.833333	1
MEDIANA	59	1	4	0	0	1	1	0	0	1	1	1	0	0	#NUM!	#NUM!	3	3	2	3.5	5	5	0	0	0	0	0	1	1	0	1	1	#NUM!	1	1	0	0	1	0	#NUM!	0	#NUM!	0	4	4	4	4	1	1
MODA	58	1	5	jubilado	vallecas	1	1	0	0	1	1	1	0	0	#N/A	#N/A	3	3	2	4	5	5	0	0	0	0	0	1	1	#N/A	1	1	#N/A	1	1	0	0	1	0	#N/A	0	#N/A	0	5	4	4	4	1	1
DESV EST	11.9999	0.46934	1.2957	0	#DIV/0!	0	0.240435	0.289683	0.476869	0.374634	0.480142	0.501745	0.310275	0.456244	#DIV/0!	#DIV/0!	1.1127	0.987743	1.19655	1.09135	1.16496	0.682605	0.266638	0.240435	0.345804	0.209895	0	0.422282	0.123091	#DIV/0!	0.348072	0.333333	#DIV/0!	0.27049	0.405505	0.27049	0.175368	0.501733	0.436436	#DIV/0!	0.491747	#DIV/0!	0.492366	1.14085	1	0.928209	0.993936	0.375534	0.645497
																																											0.426829
Prueba t para medias de dos muestras emparejadas
	Variable 1	Variable 2		Prueba t para medias de dos muestras emparejadas					Prueba t para medias de dos muestras emparejadas				Prueba t para medias de dos muestras emparejadas			Prueba t para medias de dos muestras emparejadas			Prueba t para medias de dos muestras emparejadas			Prueba t para medias de dos muestras emparejadas								Prueba t para medias de dos muestras emparejadas			Prueba t para medias de dos muestras emparejadas			Prueba t para medias de dos muestras emparejadas			Prueba t para medias de dos muestras emparejadas			Prueba t para medias de dos muestras emparejadas						Prueba t para medias de dos muestras emparejadas
Media	4.77778	4.93651																																														13.1
Varianza	0.46595	0.0604199			Variable 1	Variable 2				Variable 1	Variable 2			Variable 1	Variable 2		Variable 1	Variable 2		Variable 1	Variable 2		Variable 1						Variable 2		Variable 1	Variable 2		Variable 1	Variable 2		Variable 1	Variable 2		Variable 1	Variable 2		Variable 1	Variable 2					Variable 1
Observaciones	63	63		Media	4.12245	4.5			Media	4.03659	4.47561		Media	3.74286	3.84286	Media	3.73438	4.01562	Media	0.818182	0.954545	Media	0.393939						0.954545	Media	0.409091	0.863636	Media	3.2069	3.39655	Media	3.025	2.575	Media	2.0303	1.75758	Media	3.48889	3.37778				Media	0.0757576
Coeficiente de correlación de Pearson	-0.0854469			Varianza	1.15136	0.5			Varianza	1.07988	0.54939		Varianza	0.961345	1.18782	Varianza	0.96749	1.20136	Varianza	0.151049	0.0440559	Varianza	0.242424						0.0440559	Varianza	0.245455	0.11958	Varianza	1.25469	1.26104	Varianza	0.999359	0.96859	Varianza	1.5303	1.06439	Varianza	1.25556	0.922222				Varianza	0.0710956
Diferencia hipotética de las medias	0			Observaciones	49	49			Observaciones	41	41		Observaciones	35	35	Observaciones	32	32	Observaciones	66	66	Observaciones	66						66	Observaciones	66	66	Observaciones	58	58	Observaciones	40	40	Observaciones	33	33	Observaciones	45	45				Observaciones	66
Grados de libertad	62			Coeficiente de correlación de Pearson	0.411869				Coeficiente de correlación de Pearson	0.504275			Coeficiente de correlación de Pearson	0.662928		Coeficiente de correlación de Pearson	0.759483		Coeficiente de correlación de Pearson	0.0857241		Coeficiente de correlación de Pearson	0.175933							Coeficiente de correlación de Pearson	0.330623		Coeficiente de correlación de Pearson	0.533367		Coeficiente de correlación de Pearson	0.506251		Coeficiente de correlación de Pearson	0.544618		Coeficiente de correlación de Pearson	0.669297					Coeficiente de correlación de Pearson	0.212417
Estadístico t	-1.69109			Diferencia hipotética de las medias	0				Diferencia hipotética de las medias	0			Diferencia hipotética de las medias	0		Diferencia hipotética de las medias	0		Diferencia hipotética de las medias	0		Diferencia hipotética de las medias	0							Diferencia hipotética de las medias	0		Diferencia hipotética de las medias	0		Diferencia hipotética de las medias	0		Diferencia hipotética de las medias	0		Diferencia hipotética de las medias	0					Diferencia hipotética de las medias	0
P(T<=t) una cola	0.0479208			Grados de libertad	48				Grados de libertad	40			Grados de libertad	34		Grados de libertad	31		Grados de libertad	65		Grados de libertad	65							Grados de libertad	65		Grados de libertad	57		Grados de libertad	39		Grados de libertad	32		Grados de libertad	44					Grados de libertad	65
Valor crítico de t (una cola)	1.6698			Estadístico t	-2.6087				Estadístico t	-3.04473			Estadístico t	-0.691312		Estadístico t	-2.18282		Estadístico t	-2.60309		Estadístico t	-9.10665							Estadístico t	-7.3598		Estadístico t	-1.33309		Estadístico t	2.88706		Estadístico t	1.42749		Estadístico t	0.868					Estadístico t	0.814411
P(T<=t) dos colas	0.0958415			P(T<=t) una cola	0.0060406				P(T<=t) una cola	0.00205338			P(T<=t) una cola	0.247032		P(T<=t) una cola	0.0183729		P(T<=t) una cola	0.00571675		P(T<=t) una cola	1.60793e-13							P(T<=t) una cola	2.00069e-10		P(T<=t) una cola	0.0939036		P(T<=t) una cola	0.00315554		P(T<=t) una cola	0.0815622		P(T<=t) una cola	0.195052					P(T<=t) una cola	0.209192
Valor crítico de t (dos colas)	1.99897			Valor crítico de t (una cola)	1.67722				Valor crítico de t (una cola)	1.68385			Valor crítico de t (una cola)	1.69092		Valor crítico de t (una cola)	1.69552		Valor crítico de t (una cola)	1.66864		Valor crítico de t (una cola)	1.66864							Valor crítico de t (una cola)	1.66864		Valor crítico de t (una cola)	1.67203		Valor crítico de t (una cola)	1.68488		Valor crítico de t (una cola)	1.69389		Valor crítico de t (una cola)	1.68023					Valor crítico de t (una cola)	1.66864
				P(T<=t) dos colas	0.0120812				P(T<=t) dos colas	0.00410676			P(T<=t) dos colas	0.494063		P(T<=t) dos colas	0.0367458		P(T<=t) dos colas	0.0114335		P(T<=t) dos colas	3.21586e-13							P(T<=t) dos colas	4.00139e-10		P(T<=t) dos colas	0.187807		P(T<=t) dos colas	0.00631107		P(T<=t) dos colas	0.163124		P(T<=t) dos colas	0.390104					P(T<=t) dos colas	0.418383
				Valor crítico de t (dos colas)	2.01063				Valor crítico de t (dos colas)	2.02108			Valor crítico de t (dos colas)	2.03224		Valor crítico de t (dos colas)	2.03951		Valor crítico de t (dos colas)	1.99714		Valor crítico de t (dos colas)	1.99714							Valor crítico de t (dos colas)	1.99714		Valor crítico de t (dos colas)	2.00247		Valor crítico de t (dos colas)	2.02269		Valor crítico de t (dos colas)	2.03693		Valor crítico de t (dos colas)	2.01537					Valor crítico de t (dos colas)	1.99714
P20-PFIZER	P20-MODERNA	P20-AZ	P20-JANSSEN		P8-PFIZER	P8-MODERNA	P8-ASTRAZENECA	P-8JANSSEN			P11-T	P11-PW	P11-RS	P11-P		P13-T	P13-PW	P13-RS	P13-P
											3					4
2	2	2	2		2	2	1	1			1	3				2	3
5					5						3	3	2	4		3	1	1	3
5	5	5	5		5	5	5	5			3	3	3	3		3	3	3	3
5					5
2	2				5	5					2	2		3		3	3		3
	5	5				5	5				5					5
5	5	4	5		4	4	4	4			4	4	3	4		3	4	3	4
3			3		5			4			3	2	2	3		3	1	1	3
	4	4				5	4				5					5
5					4						2	2	2	2		2	3	3	2
4	4	3	5		5	5	3	5			1	1	1	4		4	2	1	4
4	4	4	4		4	4	4	4			4	2	2	3		4	2	1	3
4	4	4	4		4	5	4	4			1	1	1	1		1	1	1	1
4	4	3	3		4	4	3	3			3	4		3		3	3		3
1	1	1	1		2	2	1	1			3	1	1	3		3	1	1	3
4	4	4	4		5	5	5	5			3	3	1	4		3	2	1	4
4	4	4	4		4	4	3	3			4	4	2	4		5	4	2	4
4	4	4	4		4	4	3	3			4	5				2	2
	5					4					3	3	0	3		2	3	2	3
5					4
5	5	5	5		5	5	5	5			5			5		5			5
4					4						2			4		3			4
5					4						4	3		4		1	1		2
	4	4				4	4					4		5			4		4
5					5						3			4		2			3
4	4.5	3	3.5		4.5	4.5	3.5	3.5			2	2	2	2		3	2	0	2
5	5	5	5		5	5	2	5			5			5		5			5
											3			3		3			3
		3					4				1	2	2	2		1	1	1	1
4	4				4	4					4		1			3		0
4					5						2					5
4	4	4	4		4	4	4	4			4	3	3	4		4	3	1	4
5	5	4	3		4	5	4	4			3	3	1	4		3	3	1	4
5	5	2	3		5	5	3	3			3	2	4	1		4	3	2	4
2					5						3					2
5					5
	5					5					5	3	2	5		5	3	2	4
											3	4	3	3		3	3	3	3
5	5	5	5		5	5	5	5			3	4	3	4		4	3	3	3
4	4	4	4		5	5	4	4			3	3	2	3		3	3	3	3
4	4	4	4		5	5	5	5			3	4	2	3		4	3	2	4
5	5	4	5		5	5	3	5						3					5
4	4	3	3		4	4	3	3			4	4	2	4		3	3	2	3
	5					5
3	3	3	3		5	5	5	5			3	3	3	3		3	3	3	3
											2	3	0	2		2	2	2	3
1	1	4	4		5	5	5	5			2					4
											3					4
5	4	4	4		5	4	4	4			4	4	3	5		3	4	2	4
											5					5
5					5						4	4	1	4		5	5	3	3
5					5						4			4		5			5
5					5						2					3
3	3	2	2		4	4	3	3			3	3	4	3		4	2	2	3
4	4				4	4					3	3				3	3
5	4	5	4		5	5	5	5			4	3	1	4		4	3	0	4
											5					5
5	5				5	5					5					5
4	4	4	3		4	4	4	4			4	3		4		4	2		4
5	5	5	4		5	5	5	5			3	2	1	4		3	2	1	4
3	3	3	3		4	4	4	4			3			3		3			3
4	4	4	4		5	5	5	5			4	5	6	7		2	3	4	5
		4					4				1	4	1	2		4	1	1	2
[truncated: 76 more columns]

## Sheet: GRAFICOS PRE
GRAFICOS PRE
	HOMBRE	0.68
	MUJER	0.32									edad	num	hombre	Hombres	mujer	Mujeres
											0-29	1	1	-0.0117647	0	0
											30-39	3	2	-0.0235294	1	0.0117647
											40-49	9	5	-0.0588235	4	0.0470588
											50-59	30	20	-0.235294	10	0.117647
											60-69	24	17	-0.2	7	0.0823529
											70-79	15	11	-0.129412	4	0.0470588
											80-89	3	2	-0.0235294	1	0.0117647			Ninguno	0
												85	57	-0.670588	27	0.317647			Primaria	8
																			Secundaria	3
																			FP	5
																			Universidad	10
																			Doctorado	0
																				26									Ninguno	1	#NAME?
																													Primaria	5
																													Secundaria	14
																													FP	18
																													Universidad	13
																													Doctorado	1
																														52
																									-65	primaria	secundaria	fp	univ			65	ninguno	prim	secundar	fp	univ	doctor
																										1	1	1	1				1	1	1	1	1	1
																										1	1	1	1				0	1	1	1	1
																										1	1	1	1				0	1	1	1	1
	administracion	4																								1	0	1	1				0	1	1	1	1
	educacion	4																								1	0	1	1				0	1	1	1	1
	comercial	1																	jubilado	22						1	0	0	1				0	0	1	1	1
	audiovisual	2																	oficina	2						1	0	0	1				0	0	1	1	1
	Transporte	5																	casa	2						1	0	0	1				0	0	1	1	1
	jubilado	9																	limpieza	1						0	0	0	1				0	0	1	1	1
	mantenimiento	2																	director comercial	1						0	0	0	0				0	0	1	1	1
	Casa	1																								0	0	0	0				0	0	1	1	1
	Sanitario	2																								0	0	0	0				0	0	1	1	1
	Secretario	1																								0	0	0	0				0	0	1	1	1
	peluqueria	1																								0	0	0	0				0	0	1	1	0
	agriculttor	1																								0	0	0	0				0	0	0	1	0
	pintor	1																								0	0	0	0				0	0	0	1	0
	limpieza	3																								0	0	0	0				0	0	0	1	0
	teleoperador	1																								0	0	0	0				0	0	0	1	0
	aviacion	1																								0	0	0	0				0	0	0	0	0
	repartidor	1																								0	0	0	0				0	0	0	0	0
	cerrajeria	1																								0	0	0	0				0	0	0	0	0
	arquitecto	1																								0	0	0	0				0	0	0	0	0
	oficina	1																								0	0	0	0				0	0	0	0	0
	jardineria	1																								0	0	0	0				0	0	0	0	0
	tecnico	1																								0	0	0	0				0	0	0	0	0
	seguridad	1																								0	0	0	0				0	0	0	0	0
	economista	1																															0	0	0	0	0
	sector energetico	1																															0	0	0	0	0
	TELECOMUNICACIONES	1																															0	0	0	0	0
																																	0	0	0	0	0
																																	0	0	0	0	0
																																	0	0	0	0	0
																																	0	0	0	0	0
																																	0	0	0	0	0
															Prueba t para dos muestras suponiendo varianzas iguales																		0	0	0	0	0
																																	0	0	0	0	0
																Variable 1	Variable 2																0	0	0	0	0
			conocimientos	ganancia relativa	pre	post									Media	0.307692	0.0961538																0	0	0	0	0
			Importancia de las vacunas	0.695652	0.95	0.99									Varianza	0.221538	0.0886124																0	0	0	0	0
			Mitos	0.478261	0.77	0.88									Observaciones	26	52																0	0	0	0	0
			Funcionamiento de vacunas	0.918033	0.39	0.95									Varianza agrupada	0.132338																	0	0	0	0	0
			Vacunación gripe	0.72	0.82	0.95									Diferencia hipotética de las medias	0																	0	0	0	0	0
			Vacunación neumococo	0.76	0.41	0.86									Grados de libertad	76																	0	0	0	0	0
															Estadístico t	2.42096																	0	0	0	0	0
															P(T<=t) una cola	0.00893294																	0	0	0	0	0
															Valor crítico de t (una cola)	1.66515																	0	0	0	0	0
															P(T<=t) dos colas	0.0178659																	0	0	0	0	0
															Valor crítico de t (dos colas)	1.99167																	0	0	0	0	0
																																	0	0	0	0	0
																																	0	0	0	0	0
																																	0	0	0	0	0
																																	0	0	0	0	0
					<65	≥65
				COVID-19	0.98	1
				GRIPE	0.72	0.93
				NUMOCOCO	0.31	0.71

## Sheet: Hoja1
POST	P1	P2	P3-1	p3-2	p3-3	p3-4	p3-5	p3-6	P3-OTROS	P4	P5	P6	P6.1	P7	P8-PFIZER	P8-MODERNA	P8-ASTRAZENECA	P-8JANSSEN	P9	P9.1	P10	P10.1	P11	P12	P13-T	P13-PW	P13-RS	P13-P	P13-otros	P14-SI	P14-NO	P14-NOSE	P15
hombre
1	5	5	1	1	1	0	1	0		0	1	1		1	5	5			1		1		1	1	4					1	0	0	3
2	4	5	1	1	0	0	1	0		1, 2				1	2	2	1	1	1	3	1	1			2	3	1	2		1	0	0	3
3	5	5	1	1	1	0	1	1		0				1	5				1	3	1	1, 2			3	1	1	3		1	0	0	3
4	5	5	1	1	0	0	1	0		0				1	5	5	5	5	1	3	0		0	2	3	3	3	3		0	1	0	3
8	5	5	1	0	0	0	0	0		0	1	1		1		5	5		0		0		1	1	5					0	1	0	2
9	4	5	1	1	0	0	1	0		0				1	4	4	4	4	1	3	1	1			3	4	3	4	INFO MEDICA 4	0	1	0	3
10	5	5	1	1	0	0	1	1		0				1	5	5	4	4	1	3	1	1			3	1	1	3		0	1	0	3
11	5	5	0	0	0	0	0	0		1				1	4	5	4	3	1	3	1	2			5	5	1	5		0	1	0	2, 3
13	3	5	1	0	0	0	1	1		0				1	4				1	3	1	1, 2			2	3	3	2	MEDICOS Y SANITARIOS 4	1	0	0	3
14	5	5	1	1	0	0	1	1		0				1	5	5	3	5	1	3	1	1			4	2	1	4		0	0	1	3
16	5	5	1	1	0	0	0	0		0				1	4	4	4	4	1	3	1	1			4	2	1	3		1	0	0	3
17	4	5	1	0	0	0	1	1		0				1			5	5	1	3	1	1							PERSONAL SANITARIO	0	1	0	3
20	4	5	1	1	0	0	1	0		0				1	4	4	3	3	1	3	1	1			3	3	1	3		0	1	0	3
21	4	4	0	1	0	0	1	1		0		0	2	1	2	2	1	1	1	3	1	1	2	1	3	1	1	3		1	0	0	3
22	4	5	1	1	1	1	1	1		0				1	5	5	5	5	1	3	0		0	2	3	2	1	4		0	1	0	3
32	4	5	1	1	1		1	1		0				1		4			1	3	1	2		2	2	3	2	3		1	0	0	3
36	3	4	1	0	0	0	1	0		0				0	4				1	3	0			2		4				1	0	0	3
37	4	5	1	0	0	0	0	0		3				1	5	5	5	5	1	1	1	2	2	2	5	1	1	5		1	0	0	2, 3
38	4	5	1	1	0	0	0	1	CONCIENCIA SOCIAL	0				0	4				0	0					3			4		1	0	0	3
39	5	5	1	1	0	0	0	0		3				1	4	4	4	4	1	3	0				1	1	1	2		0	0	1	3
40	4	4	1	1	0	0	0	0		0				1	4	4	4	3	1	3	1	1				4		4		1	0	0	3
42	5	5	1	1	0	0	1	0	RESPONSABILIDAD SOCIAL	0				1	4.5	4.5	3.5	3.5	1	3	1	2			3	2	0	2	PROFESIONAL MEDICINA 5	1	0	0	3
45	5	5	1	1	0	0	0	0		1				1					1	3	1	2	1	1	3			3		1	0	0		CHARLAS, MEDICOS, PROFESIONALES
46	4	5	1	1	0	0	1	1		0				1	4	4	4	4	1	3	1	2	2	2	1	1	1	1	MEDICO 5	1	0	0	3
53	5	5	1	1	0	0	0	0	PROTEGER EN GENERAL	0	1	1		1	5				1	3	0	3	1	1	5					1	0	0	3
54	5	5	1	1	0	0	0	0		0				1	4	4	4	4	1	3	1	1	1	2	4	3	1	4		0	0	1	3
55	4	5	1	1	1	0	0	1		0		1		1	4	5	4	4	1	3	1	1		1	3	3	1	4		1	0	0	5
60	5	5	1	1	0	0	1	0		3	1	1	1	1	5				1	3	1	1	1	1	2	1	1			1	0	0	3
62	5	5	1	1	0	0	0	0		3				1		5			1	3	1	1	1	1	5	3	2	4		0	1	0	3
64	5	5	1	1	0	0	1	0		0				1	5	5	5	5	1	3	1	1	1	1	4	3	3	3		1	0	0	3
65	4	5	1	1	1	0	0	0		0		1		1	5	5	4	4	1	3	1	1	1	1	3	3	3	3	MEDICO 5	1	0	0	3
68	5	5	1	1	0	0	0	0		0	1	1		1	5	5	5	5	1	3	1	1	1	1	4	3	2	4		1	0	0	3
70	5	5	1	1	0	0	1	1	ACABAR CON ENF	0	1			1	5	5	3	5	1	3	1	3	2	2				5	PLATAFORMAS ENF	1	0	0	3
74	5	5	1	1	0	0	0	0		0	1	1		1	5	5	5	5	1	3	1	1	1	1	3	3	3	3		0	1	0	3
75	5	5	1	1	0	0	0	0		0				1					1	3	1	1			2	2	2	3	PROFESIONALES	1	0	0	3
76	5	5	1	1	0	0	0	0		3				1	5	5	5	5	1	3	1	1	1	1	4	1	1	3		0	0	1	3
84	5	5	1	1	1	1	0	0		0				1	5				1	3	0	1		2	5			5		1	0	0	3
87	5	5	1	1	0	0	0	0		0	1	1		1	5	4			1	3	1	1	1	1	3	3	2	2		1	0	0	3
95	5	5	0	1	1	0	0	0		0				1	4	4			0	1	1	1		2	3	3	3	3		0	1	0	3
99	5	5	1	1	0	0	1	0		0				1	5	5	5	5	1	3	1	1			4	3	0	4	MEDICO 5	0	1	0	3
102	5	5	1	1	0	0	0	0		0				1	5				1	3	1	1			5					0	1	0	3
104	5	5	1	1	0	0	0	0		0				1	5	5			1	3	1	1	1	1	5					0	1	0	3
110	5	5	1	1	0	0	1	1		0				1	5	5	5	5	1	3	1	1			3	2	1	4		1	0	0	3	pag web de sanidad
114	5	5	1	1	0	0	1	0		0				1	4	4	4	4	1	3	1	1	1	1	3	3	3	3		1	0	0	3
116	5	5	1	1	0	0	0	0		0	1	1		1	5	5	5	5	1	3	1	1	1	1	2	3	4	5		1	0	0	1, 3, 4
45	45	45	45	45	45	44	45	45	0	44	9	11	2	45	38	33	28	27	45	43	44	36	22	27	41	35	33	37	0	45	45	45	41
49.1778	4.62222	4.93333	0.933333	0.866667	0.177778	0.0454545	0.488889	0.288889	#DIV/0!	0.386364	1	0.909091	1.5	0.955556	4.47368	4.48485	4.10714	4.14815	0.933333	2.83721	0.840909	1.27778	1.09091	1.37037	3.34146	2.51429	1.66667	3.37838	#DIV/0!	0.6	0.311111	0.0888889	3.02439
34.4102	0.575598	0.252262	0.252262	0.343776	0.386646	0.210707	0.505525	0.458368	#DIV/0!	0.969678	0	0.301511	0.707107	0.208409	0.76182	0.795346	1.10014	1.13353	0.252262	0.614516	0.369989	0.566246	0.526361	0.492103	1.10927	1.03955	1.02062	0.981817	#DIV/0!	0.495434	0.468179	0.287799	0.35269
mujer
POST	P1	P2	P3-1	p3-2	p3-3	p3-4	p3-5	p3-6	P3-OTROS	P4	P5	P6	P6.1	P7	P8-PFIZER	P8-MODERNA	P8-ASTRAZENECA	P-8JANSSEN	P9	P9.1	P10	P10.1	P11	P12	P13-T	P13-PW	P13-RS	P13-P	P13-otros	P14			P15
5	5	5	1	1	0	0	0	0		0	1	1		1	5				1	3	1	1	1	1	2					0	1	0	3
6	4	5	1	1	0	0	1	0		0				1	5	5			1	3	1	1		1	3	3		3		1	0	0	3
18	5	5	1	1	1	0	1	0		0				1	4	5	4	4	1	3	1	1	1	1	1	1	1	1		1	0	0	3
27	5	5	1	1	0	0	0	1		0				1	4	4	3	3	1	3	1	1	1	1	5	4	2	4		0	1	0	2, 3
29	5	5	0	1	0	0	0	0		0		1		1	4	4	3	3	1	3	1	1	2	2	2	2	3	3	SANITARIO 5	1	0	0	3
31	4	5	1	1	0	0	0	1		0				0					1	3	1	1, 2					3			0	1	0	3
41	5	5	1	1	1	0	1	1		0				1	5				1	3	1	1			2			3	MEDICO 5	1	0	0	3
44	5	5	1	1	0	0	1	0		0	1			1	5	5	2	5	1	3	1	1	1	1	5	5	5	5		1	0	0	3
47	4	5	1	1	0	0	0	1		0				1	4	4	3	3	1	3	1	1		1	3	0	0	3		0	1	0	3
58	5	5	1	1	0	0	1	0		0				1	5	5	3	3	1	3	1	1		1	4	3	2	4	5 MEDICO	1	0	0	3, 4
61	5	5	1	1	0	0	0	1		4				1	5				1	3	1	3								1	0	0
63	4	4	1	0	0	0	0	0		0	2			1	3	3	2	2	1	3	1	1	1	1	3	3	3	3		0	1	0	1, 2, 3, 4
71	5	5	1	1	0	0	1	1		0				1	4	4	3	3	1	3	1	1			3	3	2	3		0	1	0	3
73	5	5	1	0	0	0	0	0		0	1	1		1		5			1	3	0	2	1	1					PERSONAL SANITARIO	1	0	0	3
78	5	5	1	1	0	0	1	0		0				1	5				1	3	0			1	4					0	1	0	2, 3
79	5	5	1	1	0	0	1	1		0				1	5	4	4	4	1	3	1	1	1	1	3	4	2	4		1	0	0	3
81	3	5	1	0	0	0	0	0		0				1		5			1	3	1	1	1	1	5			5		0	1	0	1
82	5	5	1	1	0	0	0	0		0		1		1	5	5	5	5	1	3	1	1	1	2	5	5	3	3		0	0	0	2, 3
93	4	5	1	1	0	0	0	0		0				1	4	4	3	3	1	1	1	1			4	2	2	3		0	1	0	2
109	5	5	1	1	1	0	1	1		0				1	4	4	4	4	1	3	1	1			4	2	1	4		0	1	0	3
117	5	5	1	1	1	0	1	0		2, 4				1			4		1	3	1	1	1	1	4	1	1	2		0	0	1	3
21	21	21	21	21	21	21	21	21	0	20	4	4	0	21	17	15	13	12	21	21	21	19	11	15	18	14	14	16	0	21	21	21	15
57.7619	4.66667	4.95238	0.952381	0.857143	0.190476	0	0.47619	0.380952	#DIV/0!	0.2	1.25	1	#DIV/0!	0.952381	4.47059	4.4	3.30769	3.5	1	2.90476	0.904762	1.15789	1.09091	1.13333	3.44444	2.71429	2.14286	3.3125	#DIV/0!	0.428571	0.47619	0.047619	2.8
31.5672	0.57735	0.218218	0.218218	0.358569	0.402374	0	0.511766	0.497613	#DIV/0!	0.894427	0.5	0	#DIV/0!	0.218218	0.624264	0.632456	0.85485	0.904534	0	0.436436	0.300793	0.50146	0.301511	0.351866	1.19913	1.48989	1.23146	1.01448	#DIV/0!	0.507093	0.511766	0.218218	0.560612
-65
POST	P1	P2	P3-1	p3-2	p3-3	p3-4	p3-5	p3-6	P3-OTROS	P4	P5	P6	P6.1	P7	P8-PFIZER	P8-MODERNA	P8-ASTRAZENECA	P-8JANSSEN	P9	P9.1	P10	P10.1	P11	P12	P13-T	P13-PW	P13-RS	P13-P	P13-otros	P14			P15
1	5	5	1	1	1	0	1	0		0	1	1		1	5	5			1		1		1	1	4					1	0	0	3
2	4	5	1	1	0	0	1	0		1, 2				1	2	2	1	1	1	3	1	1			2	3	1	2		1	0	0	3
5	5	5	1	1	0	0	0	0		0	1	1		1	5				1	3	1	1	1	1	2					0	1	0	3
6	4	5	1	1	0	0	1	0		0				1	5	5			1	3	1	1		1	3	3		3		1	0	0	3
8	5	5	1	0	0	0	0	0		0	1	1		1		5	5		0		0		1	1	5					0	1	0	2
9	4	5	1	1	0	0	1	0		0				1	4	4	4	4	1	3	1	1			3	4	3	4	INFO MEDICA 4	0	1	0	3
10	5	5	1	1	0	0	1	1		0				1	5	5	4	4	1	3	1	1			3	1	1	3		0	1	0	3
14	5	5	1	1	0	0	1	1		0				1	5	5	3	5	1	3	1	1			4	2	1	4		0	0	1	3
16	5	5	1	1	0	0	0	0		0				1	4	4	4	4	1	3	1	1			4	2	1	3		1	0	0	3
18	5	5	1	1	1	0	1	0		0				1	4	5	4	4	1	3	1	1	1	1	1	1	1	1		1	0	0	3
21	4	4	0	1	0	0	1	1		0		0	2	1	2	2	1	1	1	3	1	1	2	1	3	1	1	3		1	0	0	3
22	4	5	1	1	1	1	1	1		0				1	5	5	5	5	1	3	0		0	2	3	2	1	4		0	1	0	3
27	5	5	1	1	0	0	0	1		0				1	4	4	3	3	1	3	1	1	1	1	5	4	2	4		0	1	0	2, 3
29	5	5	0	1	0	0	0	0		0		1		1	4	4	3	3	1	3	1	1	2	2	2	2	3	3	SANITARIO 5	1	0	0	3
32	4	5	1	1	1		1	1		0				1		4			1	3	1	2		2	2	3	2	3		1	0	0	3
36	3	4	1	0	0	0	1	0		0				0	4				1	3	0			2		4				1	0	0	3
45	5	5	1	1	0	0	0	0		1				1					1	3	1	2	1	1	3			3		1	0	0		CHARLAS, MEDICOS, PROFESIONALES
46	4	5	1	1	0	0	1	1		0				1	4	4	4	4	1	3	1	2	2	2	1	1	1	1	MEDICO 5	1	0	0	3
47	4	5	1	1	0	0	0	1		0				1	4	4	3	3	1	3	1	1		1	3	0	0	3		0	1	0	3
53	5	5	1	1	0	0	0	0	PROTEGER EN GENERAL	0	1	1		1	5				1	3	0	3	1	1	5					1	0	0	3
54	5	5	1	1	0	0	0	0		0				1	4	4	4	4	1	3	1	1	1	2	4	3	1	4		0	0	1	3
55	4	5	1	1	1	0	0	1		0		1		1	4	5	4	4	1	3	1	1		1	3	3	1	4		1	0	0	5
58	5	5	1	1	0	0	1	0		0				1	5	5	3	3	1	3	1	1		1	4	3	2	4	5 MEDICO	1	0	0	3, 4
60	5	5	1	1	0	0	1	0		3	1	1	1	1	5				1	3	1	1	1	1	2	1	1			1	0	0	3
62	5	5	1	1	0	0	0	0		3				1		5			1	3	1	1	1	1	5	3	2	4		0	1	0	3
63	4	4	1	0	0	0	0	0		0	2			1	3	3	2	2	1	3	1	1	1	1	3	3	3	3		0	1	0	1, 2, 3, 4
64	5	5	1	1	0	0	1	0		0				1	5	5	5	5	1	3	1	1	1	1	4	3	3	3		1	0	0	3
65	4	5	1	1	1	0	0	0		0		1		1	5	5	4	4	1	3	1	1	1	1	3	3	3	3	MEDICO 5	1	0	0	3
70	5	5	1	1	0	0	1	1	ACABAR CON ENF	0	1			1	5	5	3	5	1	3	1	3	2	2				5	PLATAFORMAS ENF	1	0	0	3
74	5	5	1	1	0	0	0	0		0	1	1		1	5	5	5	5	1	3	1	1	1	1	3	3	3	3		0	1	0	3
75	5	5	1	1	0	0	0	0		0				1					1	3	1	1			2	2	2	3	PROFESIONALES	1	0	0	3
76	5	5	1	1	0	0	0	0		3				1	5	5	5	5	1	3	1	1	1	1	4	1	1	3		0	0	1	3
78	5	5	1	1	0	0	1	0		0				1	5				1	3	0			1	4					0	1	0	2, 3
79	5	5	1	1	0	0	1	1		0				1	5	4	4	4	1	3	1	1	1	1	3	4	2	4		1	0	0	3
82	5	5	1	1	0	0	0	0		0		1		1	5	5	5	5	1	3	1	1	1	2	5	5	3	3		0	0	1	2, 3
87	5	5	1	1	0	0	0	0		0	1	1		1	5	4			1	3	1	1	1	1	3	3	2	2		1	0	0	3
95	5	5	0	1	1	0	0	0		0				1	4	4			0	1	1	1		2	3	3	3	3		0	1	0	3
104	5	5	1	1	0	0	0	0		0				1	5	5			1	3	1	1	1	1	5					0	1	0	3
109	5	5	1	1	1	0	1	1		0				1	4	4	4	4	1	3	1	1			4	2	1	4		0	1	0	3
110	5	5	1	1	0	0	1	1		0				1	5	5	5	5	1	3	1	1			3	2	1	4		1	0	0	3	pag web de sanidad
116	5	5	1	1	0	0	0	0		0	1	1		1	5	5	5	5	1	3	1	1	1	1	2	3	4	5		1	0	0	1, 3, 4
41	41	41	41	41	41	40	41	41	0	40	10	13	2	41	36	34	27	26	41	39	41	36	25	33	39	33	31	33	0	41	41	41	34
50.8049	4.68293	4.92683	0.926829	0.926829	0.195122	0.025	0.487805	0.317073	#DIV/0!	0.25	1.1	0.923077	1.5	0.97561	4.44444	4.41176	3.77778	3.88462	0.95122	2.94872	0.878049	1.19444	1.12	1.27273	3.25641	2.51515	1.80645	3.27273	#DIV/0!	0.560976	0.341463	0.097561	3.02941
33.1461	0.521489	0.263652	0.263652	0.263652	0.401218	0.158114	0.506061	0.471117	#DIV/0!	0.808608	0.316228	0.27735	0.707107	0.156174	0.808683	0.820851	1.1547	1.17735	0.218085	0.320256	0.331295	0.524783	0.439697	0.452267	1.09347	1.12142	0.980454	0.910794	#DIV/0!	0.502433	0.480091	0.300406	0.388103
65
POST	P1	P2	P3-1	p3-2	p3-3	p3-4	p3-5	p3-6	P3-OTROS	P4	P5	P6	P6.1	P7	P8-PFIZER	P8-MODERNA	P8-ASTRAZENECA	P-8JANSSEN	P9	P9.1	P10	P10.1	P11	P12	P13-T	P13-PW	P13-RS	P13-P	P13-otros	P14			P15
3	5	5	1	1	1	0	1	1		0				1	5				1	3	1	1, 2			3	1	1	3		1	0	0	3
4	5	5	1	1	0	0	1	0		0				1	5	5	5	5	1	3	0		0	2	3	3	3	3		0	1	0	3
11	5	5	0	0	0	0	0	0		1				1	4	5	4	3	1	3	1	2			5	5	1	5		0	1	0	2, 3
13	3	5	1	0	0	0	1	1		0				1	4				1	3	1	1, 2			2	3	3	2	MEDICOS Y SANITARIOS 4	1	0	0	3
17	4	5	1	0	0	0	1	1		0				1			5	5	1	3	1	1							PERSONAL SANITARIO	0	1	0	3
20	4	5	1	1	0	0	1	0		0				1	4	4	3	3	1	3	1	1			3	3	1	3		0	1	0	3
31	4	5	1	1	0	0	0	1		0				0					1	3	1	1, 2					3			0	1	0	3
37	4	5	1	0	0	0	0	0		3					5	5	5	5	1	1	1	2	2	2	5	1	1	5		1	0	0	2, 3
38	4	5	1	1	0	0	0	1	CONCIENCIA SOCIAL	0				0	4				0	0					3			4		1	0	0	3
39	5	5	1	1	0	0	0	0		3				1	4	4	4	4	1	3	0				1	1	1	2		0	0	1	3
40	4	4	1	1	0	0	0	0		0				1	4	4	4	3	1	3	1	1				4		4		1	0	0	3
41	5	5	1	1	1	0	1	1		0				1	5				1	3	1	1			2			3	MEDICO 5	1	0	0	3
42	5	5	1	1	0	0	1	0	RESPONSABILIDAD SOCIAL	0				1	4.5	4.5	3.5	3.5	1	3	1	2			3	2	0	2	PROFESIONAL MEDICINA 5	1	0	0	3
44	5	5	1	1	0	0	1	0		0	1			1	5	5	2	5	1	3	1	1	1	1	5	5	5	5		1	0	0	3
61	5	5	1	1	0	0	0	1		4				1	5				1	3	1	3								1	0	0
68	5	5	1	1	0	0	0	0		0	1	1		1	5	5	5	5	1	3	1	1	1	1	4	3	2	4		1	0	0	3
71	5	5	1	1	0	0	1	1		0				1	4	4	3	3	1	3	1	1			3	3	2	3		0	1	0	3
81	3	5	1	0	0	0	0	0		0				1		5			1	3	1	1	1	1	5			5		0	1	0	1
84	5	5	1	1	1	1	0	0		0				1	5				1	3	0	1		2	5			5		1	0	0	3
93	4	5	1	1	0	0	0	0		0				1	4	4	3	3	1	1	1	1			4	2	2	3		0	1	0	2
99	5	5	1	1	0	0	1	0		0				1	5	5	5	5	1	3	1	1			4	3	0	4	MEDICO 5	0	1	0	3
102	5	5	1	1	0	0	0	0		0				1	5				1	3	1	1			5					0	1	0	3
114	5	5	1	1	0	0	1	0		0				1	4	4	4	4	1	3	1	1	1	1	3	3	3	3		1	0	0	3
117	5	5	1	1	1	0	1	0		2, 4				1			4		1	3	1	1	1	1	4	1	1	2		0	0	1	3
73	5	5	1	0	0	0	0	0		0	1	1		1		5			1	3	0	2	1	1					PERSONAL SANITARIO	1	0	0	3
25	25	25	25	25	25	25	25	25	0	24	3	2	0	24	19	14	14	13	25	25	24	19	8	9	20	16	16	20	0	25	25	25	22
53.72	4.56	4.96	0.96	0.76	0.16	0.04	0.48	0.32	#DIV/0!	0.458333	1	1	#DIV/0!	0.916667	4.52632	4.57143	4	4.07692	0.96	2.72	0.833333	1.31579	1	1.33333	3.6	2.6875	1.8125	3.5	#DIV/0!	0.52	0.4	0.08	2.86364
34.7641	0.650641	0.2	0.2	0.43589	0.374166	0.2	0.509902	0.476095	#DIV/0!	1.14129	0	0	#DIV/0!	0.28233	0.512989	0.513553	0.960769	0.954074	0.2	0.791623	0.380693	0.582393	0.534522	0.5	1.18766	1.30224	1.32759	1.10024	#DIV/0!	0.509902	0.5	0.276887	0.467563

## Sheet: Hoja3
Prueba t para dos muestras suponiendo varianzas iguales				Prueba t para dos muestras suponiendo varianzas iguales
7
	Variable 1	Variable 2			Variable 1	Variable 2
Media	0.87931	0.925926		Media	0.888889	0.903226
Varianza	0.107985	0.0712251		Varianza	0.100629	0.0903226
Observaciones	58	27		Observaciones	54	31
Varianza agrupada	0.0964702			Varianza agrupada	0.0969037
Diferencia hipotética de las medias	0			Diferencia hipotética de las medias	0
Grados de libertad	83			Grados de libertad	83
Estadístico t	-0.6442			Estadístico t	-0.204387
P(T<=t) una cola	0.260611			P(T<=t) una cola	0.419276
Valor crítico de t (una cola)	1.66342			Valor crítico de t (una cola)	1.66342
P(T<=t) dos colas	0.521222			P(T<=t) dos colas	0.838551
Valor crítico de t (dos colas)	1.98896			Valor crítico de t (dos colas)	1.98896
Prueba t para dos muestras suponiendo varianzas iguales				Prueba t para dos muestras suponiendo varianzas iguales
8
	Variable 1	Variable 2			Variable 1	Variable 2
Media	0.137931	0.0740741		Media	0.166667	0.0322581
Varianza	0.120992	0.0712251		Varianza	0.141509	0.0322581
Observaciones	58	27		Observaciones	54	31
Varianza agrupada	0.105402			Varianza agrupada	0.102021
Diferencia hipotética de las medias	0			Diferencia hipotética de las medias	0
Grados de libertad	83			Grados de libertad	83
Estadístico t	0.844247			Estadístico t	1.86746
P(T<=t) una cola	0.200479			P(T<=t) una cola	0.0326838
Valor crítico de t (una cola)	1.66342			Valor crítico de t (una cola)	1.66342
P(T<=t) dos colas	0.400958			P(T<=t) dos colas	0.0653676
Valor crítico de t (dos colas)	1.98896			Valor crítico de t (dos colas)	1.98896
Prueba t para dos muestras suponiendo varianzas iguales				Prueba t para dos muestras suponiendo varianzas iguales
9
	Variable 1	Variable 2			Variable 1	Variable 2
Media	0.403509	0.407407		Media	0.509434	0.225806
Varianza	0.244987	0.250712		Varianza	0.254717	0.180645
Observaciones	57	27		Observaciones	53	31
Varianza agrupada	0.246803			Varianza agrupada	0.227618
Diferencia hipotética de las medias	0			Diferencia hipotética de las medias	0
Grados de libertad	82			Grados de libertad	82
Estadístico t	-0.0335906			Estadístico t	2.62921
P(T<=t) una cola	0.486643			P(T<=t) una cola	0.00510845
Valor crítico de t (una cola)	1.66365			Valor crítico de t (una cola)	1.66365
P(T<=t) dos colas	0.973285			P(T<=t) dos colas	0.0102169
Valor crítico de t (dos colas)	1.98932			Valor crítico de t (dos colas)	1.98932
Prueba t para dos muestras suponiendo varianzas iguales				Prueba t para dos muestras suponiendo varianzas iguales					Prueba t para dos muestras suponiendo varianzas iguales					Prueba t para dos muestras suponiendo varianzas iguales					Prueba t para dos muestras suponiendo varianzas iguales				Prueba t para dos muestras suponiendo varianzas iguales				Prueba t para dos muestras suponiendo varianzas iguales				Prueba t para dos muestras suponiendo varianzas iguales
10									10.2										10.3								10.4
	Variable 1	Variable 2			Variable 1	Variable 2				Variable 1	Variable 2				Variable 1	Variable 2				Variable 1	Variable 2			Variable 1	Variable 2			Variable 1	Variable 2			Variable 1	Variable 2
Media	0.666667	0.555556		Media	0.603774	0.677419			Media	0.491228	0.555556			Media	0.584906	0.387097			Media	0.0877193	0.0740741		Media	0.0754717	0.0967742		Media	0.350877	0.148148		Media	0.226415	0.387097
Varianza	0.22619	0.25641		Varianza	0.243832	0.225806			Varianza	0.254386	0.25641			Varianza	0.24746	0.245161			Varianza	0.0814536	0.0712251		Varianza	0.0711176	0.0903226		Varianza	0.23183	0.131054		Varianza	0.17852	0.245161
Observaciones	57	27		Observaciones	53	31			Observaciones	57	27			Observaciones	53	31			Observaciones	57	27		Observaciones	53	31		Observaciones	57	27		Observaciones	53	31
Varianza agrupada	0.235772			Varianza agrupada	0.237237				Varianza agrupada	0.255028				Varianza agrupada	0.246619				Varianza agrupada	0.0782104			Varianza agrupada	0.0781438			Varianza agrupada	0.199876			Varianza agrupada	0.202901
Diferencia hipotética de las medias	0			Diferencia hipotética de las medias	0				Diferencia hipotética de las medias	0				Diferencia hipotética de las medias	0				Diferencia hipotética de las medias	0			Diferencia hipotética de las medias	0			Diferencia hipotética de las medias	0			Diferencia hipotética de las medias	0
Grados de libertad	82			Grados de libertad	82				Grados de libertad	82				Grados de libertad	82				Grados de libertad	82			Grados de libertad	82			Grados de libertad	82			Grados de libertad	82
Estadístico t	0.979469			Estadístico t	-0.668707				Estadístico t	-0.545233				Estadístico t	1.76162				Estadístico t	0.208847			Estadístico t	-0.337025			Estadístico t	1.94095			Estadístico t	-1.57762
P(T<=t) una cola	0.165115			P(T<=t) una cola	0.25278				P(T<=t) una cola	0.293537				P(T<=t) una cola	0.0409306				P(T<=t) una cola	0.417543			P(T<=t) una cola	0.368479			P(T<=t) una cola	0.0278499			P(T<=t) una cola	0.059251
Valor crítico de t (una cola)	1.66365			Valor crítico de t (una cola)	1.66365				Valor crítico de t (una cola)	1.66365				Valor crítico de t (una cola)	1.66365				Valor crítico de t (una cola)	1.66365			Valor crítico de t (una cola)	1.66365			Valor crítico de t (una cola)	1.66365			Valor crítico de t (una cola)	1.66365
P(T<=t) dos colas	0.330229			P(T<=t) dos colas	0.505561				P(T<=t) dos colas	0.587073				P(T<=t) dos colas	0.0818612				P(T<=t) dos colas	0.835086			P(T<=t) dos colas	0.736959			P(T<=t) dos colas	0.0556998			P(T<=t) dos colas	0.118502
Valor crítico de t (dos colas)	1.98932			Valor crítico de t (dos colas)	1.98932				Valor crítico de t (dos colas)	1.98932				Valor crítico de t (dos colas)	1.98932				Valor crítico de t (dos colas)	1.98932			Valor crítico de t (dos colas)	1.98932			Valor crítico de t (dos colas)	1.98932			Valor crítico de t (dos colas)	1.98932
Prueba t para dos muestras suponiendo varianzas iguales				Prueba t para dos muestras suponiendo varianzas iguales
14
	Variable 1	Variable 2			Variable 1	Variable 2
Media	1	0.962963		Media	0.981481	1
Varianza	0	0.037037		Varianza	0.0185185	0
Observaciones	57	27		Observaciones	54	31
Varianza agrupada	0.0117435			Varianza agrupada	0.0118251
Diferencia hipotética de las medias	0			Diferencia hipotética de las medias	0
Grados de libertad	82			Grados de libertad	83
Estadístico t	1.46291			Estadístico t	-0.75574
P(T<=t) una cola	0.0736571			P(T<=t) una cola	0.225972
Valor crítico de t (una cola)	1.66365			Valor crítico de t (una cola)	1.66342
P(T<=t) dos colas	0.147314			P(T<=t) dos colas	0.451944
Valor crítico de t (dos colas)	1.98932			Valor crítico de t (dos colas)	1.98896
Prueba t para dos muestras suponiendo varianzas iguales				Prueba t para dos muestras suponiendo varianzas iguales
18
	Variable 1	Variable 2			Variable 1	Variable 2
Media	0.267857	0.615385		Media	0.471698	0.258065
Varianza	0.199675	0.246154		Varianza	0.253991	0.197849
Observaciones	56	26		Observaciones	53	31
Varianza agrupada	0.2142			Varianza agrupada	0.233452
Diferencia hipotética de las medias	0			Diferencia hipotética de las medias	0
Grados de libertad	80			Grados de libertad	82
Estadístico t	-3.16412			Estadístico t	1.95547
P(T<=t) una cola	0.00109993			P(T<=t) una cola	0.0269671
Valor crítico de t (una cola)	1.66412			Valor crítico de t (una cola)	1.66365
P(T<=t) dos colas	0.00219986			P(T<=t) dos colas	0.0539342
Valor crítico de t (dos colas)	1.99006			Valor crítico de t (dos colas)	1.98932
Prueba t para dos muestras suponiendo varianzas iguales				Prueba t para dos muestras suponiendo varianzas iguales
21
	Variable 1	Variable 2			Variable 1	Variable 2
Media	0.807018	0.851852		Media	0.792453	0.903226
Varianza	0.158521	0.131054		Varianza	0.167634	0.0903226
Observaciones	57	27		Observaciones	53	31
Varianza agrupada	0.149812			Varianza agrupada	0.139349
Diferencia hipotética de las medias	0			Diferencia hipotética de las medias	0
Grados de libertad	82			Grados de libertad	82
Estadístico t	-0.495811			Estadístico t	-1.31238
P(T<=t) una cola	0.310677			P(T<=t) una cola	0.0965265
Valor crítico de t (una cola)	1.66365			Valor crítico de t (una cola)	1.66365
P(T<=t) dos colas	0.621354			P(T<=t) dos colas	0.193053
Valor crítico de t (dos colas)	1.98932			Valor crítico de t (dos colas)	1.98932
Prueba t para dos muestras suponiendo varianzas iguales				Prueba t para dos muestras suponiendo varianzas iguales				Prueba t para dos muestras suponiendo varianzas iguales				Prueba t para dos muestras suponiendo varianzas iguales				Prueba t para dos muestras suponiendo varianzas iguales				Prueba t para dos muestras suponiendo varianzas iguales				Prueba t para dos muestras suponiendo varianzas iguales				Prueba t para dos muestras suponiendo varianzas iguales				Prueba t para dos muestras suponiendo varianzas iguales				Prueba t para dos muestras suponiendo varianzas iguales
21-t								21-rs								21-i								21-p								21-ps
	Variable 1	Variable 2			Variable 1	Variable 2			Variable 1	Variable 2			Variable 1	Variable 2			Variable 1	Variable 2			Variable 1	Variable 2			Variable 1	Variable 2			Variable 1	Variable 2			Variable 1	Variable 2			Variable 1	Variable 2
Media	0.649123	0.555556		Media	0.113208	0.16129		Media	0.140351	0.111111		Media	0.113208	0.172414		Media	0.298246	0.296296		Media	0.339623	0.225806		Media	0.22807	0.222222		Media	0.169811	0.322581		Media	0.526316	0.444444		Media	0.490566	0.548387
Varianza	0.23183	0.25641		Varianza	0.102322	0.139785		Varianza	0.122807	0.102564		Varianza	0.102322	0.147783		Varianza	0.213033	0.216524		Varianza	0.228592	0.180645		Varianza	0.179198	0.179487		Varianza	0.143687	0.225806		Varianza	0.253759	0.25641		Varianza	0.254717	0.255914
Observaciones	57	27		Observaciones	53	31		Observaciones	57	27		Observaciones	53	29		Observaciones	57	27		Observaciones	53	31		Observaciones	57	27		Observaciones	53	31		Observaciones	57	27		Observaciones	53	31
Varianza agrupada	0.239623			Varianza agrupada	0.116028			Varianza agrupada	0.116389			Varianza agrupada	0.118234			Varianza agrupada	0.21414			Varianza agrupada	0.211051			Varianza agrupada	0.17929			Varianza agrupada	0.17373			Varianza agrupada	0.2546			Varianza agrupada	0.255155
Diferencia hipotética de las medias	0			Diferencia hipotética de las medias	0			Diferencia hipotética de las medias	0			Diferencia hipotética de las medias	0			Diferencia hipotética de las medias	0			Diferencia hipotética de las medias	0			Diferencia hipotética de las medias	0			Diferencia hipotética de las medias	0			Diferencia hipotética de las medias	0			Diferencia hipotética de las medias	0
Grados de libertad	82			Grados de libertad	82			Grados de libertad	82			Grados de libertad	80			Grados de libertad	82			Grados de libertad	82			Grados de libertad	82			Grados de libertad	82			Grados de libertad	82			Grados de libertad	82
Estadístico t	0.818161			Estadístico t	-0.624291			Estadístico t	0.366858			Estadístico t	-0.745465			Estadístico t	0.0180307			Estadístico t	1.0957			Estadístico t	0.0591161			Estadístico t	-1.62098			Estadístico t	0.694516			Estadístico t	-0.506248
P(T<=t) una cola	0.207818			P(T<=t) una cola	0.267085			P(T<=t) una cola	0.357335			P(T<=t) una cola	0.229088			P(T<=t) una cola	0.492829			P(T<=t) una cola	0.13821			P(T<=t) una cola	0.476502			P(T<=t) una cola	0.0544307			P(T<=t) una cola	0.244661			P(T<=t) una cola	0.307021
Valor crítico de t (una cola)	1.66365			Valor crítico de t (una cola)	1.66365			Valor crítico de t (una cola)	1.66365			Valor crítico de t (una cola)	1.66412			Valor crítico de t (una cola)	1.66365			Valor crítico de t (una cola)	1.66365			Valor crítico de t (una cola)	1.66365			Valor crítico de t (una cola)	1.66365			Valor crítico de t (una cola)	1.66365			Valor crítico de t (una cola)	1.66365
P(T<=t) dos colas	0.415636			P(T<=t) dos colas	0.53417			P(T<=t) dos colas	0.71467			P(T<=t) dos colas	0.458175			P(T<=t) dos colas	0.985658			P(T<=t) dos colas	0.27642			P(T<=t) dos colas	0.953003			P(T<=t) dos colas	0.108861			P(T<=t) dos colas	0.489322			P(T<=t) dos colas	0.614041
Valor crítico de t (dos colas)	1.98932			Valor crítico de t (dos colas)	1.98932			Valor crítico de t (dos colas)	1.98932			Valor crítico de t (dos colas)	1.99006			Valor crítico de t (dos colas)	1.98932			Valor crítico de t (dos colas)	1.98932			Valor crítico de t (dos colas)	1.98932			Valor crítico de t (dos colas)	1.98932			Valor crítico de t (dos colas)	1.98932			Valor crítico de t (dos colas)	1.98932
Prueba t para dos muestras suponiendo varianzas iguales				Prueba t para dos muestras suponiendo varianzas iguales
22
	Variable 1	Variable 2			Variable 1	Variable 2
Media	0.465517	0.444444		Media	0.481481	0.466667
Varianza	0.253176	0.25641		Varianza	0.254368	0.257471
Observaciones	58	27		Observaciones	54	30
Varianza agrupada	0.254189			Varianza agrupada	0.255465
Diferencia hipotética de las medias	0			Diferencia hipotética de las medias	0
Grados de libertad	83			Grados de libertad	82
Estadístico t	0.179403			Estadístico t	0.128721
P(T<=t) una cola	0.429029			P(T<=t) una cola	0.448947
Valor crítico de t (una cola)	1.66342			Valor crítico de t (una cola)	1.66365
P(T<=t) dos colas	0.858058			P(T<=t) dos colas	0.897894
Valor crítico de t (dos colas)	1.98896			Valor crítico de t (dos colas)	1.98932
Prueba t para dos muestras suponiendo varianzas iguales				Prueba t para dos muestras suponiendo varianzas iguales
23
	Variable 1	Variable 2			Variable 1	Variable 2
Media	0.803571	0.703704		Media	0.722222	0.933333
Varianza	0.160714	0.216524		Varianza	0.279874	0.0643678
Observaciones	56	27		Observaciones	54	30
Varianza agrupada	0.178629			Varianza agrupada	0.203659
Diferencia hipotética de las medias	0			Diferencia hipotética de las medias	0
Grados de libertad	81			Grados de libertad	82
Estadístico t	1.00852			Estadístico t	-2.05437
P(T<=t) una cola	0.158103			P(T<=t) una cola	0.0215627
Valor crítico de t (una cola)	1.66388			Valor crítico de t (una cola)	1.66365
P(T<=t) dos colas	0.316206			P(T<=t) dos colas	0.0431253
Valor crítico de t (dos colas)	1.98969			Valor crítico de t (dos colas)	1.98932
Prueba t para dos muestras suponiendo varianzas iguales				Prueba t para dos muestras suponiendo varianzas iguales
24
	Variable 1	Variable 2			Variable 1	Variable 2
Media	0.111111	0.157895		Media	0.171429	0.0714286
Varianza	0.10101	0.140351		Varianza	0.146218	0.0687831
Observaciones	45	19		Observaciones	35	28
Varianza agrupada	0.112432			Varianza agrupada	0.111944
Diferencia hipotética de las medias	0			Diferencia hipotética de las medias	0
Grados de libertad	62			Grados de libertad	61
Estadístico t	-0.509968			Estadístico t	1.17881
P(T<=t) una cola	0.305942			P(T<=t) una cola	0.121526
Valor crítico de t (una cola)	1.6698			Valor crítico de t (una cola)	1.67022
P(T<=t) dos colas	0.611885			P(T<=t) dos colas	0.243053
Valor crítico de t (dos colas)	1.99897			Valor crítico de t (dos colas)	1.99962
Prueba t para dos muestras suponiendo varianzas iguales				Prueba t para dos muestras suponiendo varianzas iguales
25
	Variable 1	Variable 2			Variable 1	Variable 2
Media	0.678571	0.72		Media	0.596154	0.866667
Varianza	0.222078	0.21		Varianza	0.245475	0.11954
Observaciones	56	25		Observaciones	52	30
Varianza agrupada	0.218409			Varianza agrupada	0.199824
Diferencia hipotética de las medias	0			Diferencia hipotética de las medias	0
Grados de libertad	79			Grados de libertad	80
Estadístico t	-0.368542			Estadístico t	-2.63949
P(T<=t) una cola	0.356728			P(T<=t) una cola	0.00498921
Valor crítico de t (una cola)	1.66437			Valor crítico de t (una cola)	1.66412
P(T<=t) dos colas	0.713455			P(T<=t) dos colas	0.00997842
Valor crítico de t (dos colas)	1.99045			Valor crítico de t (dos colas)	1.99006
Prueba t para dos muestras suponiendo varianzas iguales				Prueba t para dos muestras suponiendo varianzas iguales
27
	Variable 1	Variable 2			Variable 1	Variable 2
Media	0.586207	0.615385		Media	0.555556	0.645161
Varianza	0.246824	0.246154		Varianza	0.251572	0.236559
Observaciones	58	26		Observaciones	54	31
Varianza agrupada	0.24662			Varianza agrupada	0.246146
Diferencia hipotética de las medias	0			Diferencia hipotética de las medias	0
Grados de libertad	82			Grados de libertad	83
Estadístico t	-0.248942			Estadístico t	-0.801508
P(T<=t) una cola	0.402014			P(T<=t) una cola	0.212563
Valor crítico de t (una cola)	1.66365			Valor crítico de t (una cola)	1.66342
P(T<=t) dos colas	0.804028			P(T<=t) dos colas	0.425126
Valor crítico de t (dos colas)	1.98932			Valor crítico de t (dos colas)	1.98896
Prueba t para dos muestras suponiendo varianzas iguales				Prueba t para dos muestras suponiendo varianzas iguales
31
	Variable 1	Variable 2			Variable 1	Variable 2
Media	0.189655	0.296296		Media	0.12963	0.387097
Varianza	0.156382	0.216524		Varianza	0.114955	0.245161
Observaciones	58	27		Observaciones	54	31
Varianza agrupada	0.175222			Varianza agrupada	0.162017
Diferencia hipotética de las medias	0			Diferencia hipotética de las medias	0
Grados de libertad	83			Grados de libertad	83
Estadístico t	-1.0935			Estadístico t	-2.83863
P(T<=t) una cola	0.13867			P(T<=t) una cola	0.00284731
Valor crítico de t (una cola)	1.66342			Valor crítico de t (una cola)	1.66342
P(T<=t) dos colas	0.27734			P(T<=t) dos colas	0.00569462
Valor crítico de t (dos colas)	1.98896			Valor crítico de t (dos colas)	1.98896
Prueba t para dos muestras suponiendo varianzas iguales				Prueba t para dos muestras suponiendo varianzas iguales				Prueba t para dos muestras suponiendo varianzas iguales				Prueba t para dos muestras suponiendo varianzas iguales				Prueba t para dos muestras suponiendo varianzas iguales			Prueba t para dos muestras suponiendo varianzas iguales				Prueba t para dos muestras suponiendo varianzas iguales				Prueba t para dos muestras suponiendo varianzas iguales
32-C								32-G								32-N							32-NING
	Variable 1	Variable 2			Variable 1	Variable 2			Variable 1	Variable 2			Variable 1	Variable 2			Variable 1	Variable 2		Variable 1	Variable 2			Variable 1	Variable 2			Variable 1	Variable 2
Media	0.706897	0.777778		Media	0.796296	0.645161		Media	0.655172	0.814815		Media	0.740741	0.645161		Media	0.448276	0.555556	Media	0.5	0.451613		Media	0.137931	0.0740741		Media	0.0740741	0.193548
Varianza	0.210829	0.179487		Varianza	0.165269	0.236559		Varianza	0.229885	0.156695		Varianza	0.195667	0.236559		Varianza	0.251664	0.25641	Varianza	0.254717	0.255914		Varianza	0.120992	0.0712251		Varianza	0.0698812	0.16129
Observaciones	58	27		Observaciones	54	31		Observaciones	58	27		Observaciones	54	31		Observaciones	58	27	Observaciones	54	31		Observaciones	58	27		Observaciones	54	31
Varianza agrupada	0.201011			Varianza agrupada	0.191037			Varianza agrupada	0.206958			Varianza agrupada	0.210448			Varianza agrupada	0.253151		Varianza agrupada	0.25515			Varianza agrupada	0.105402			Varianza agrupada	0.102921
Diferencia hipotética de las medias	0			Diferencia hipotética de las medias	0			Diferencia hipotética de las medias	0			Diferencia hipotética de las medias	0			Diferencia hipotética de las medias	0		Diferencia hipotética de las medias	0			Diferencia hipotética de las medias	0			Diferencia hipotética de las medias	0
Grados de libertad	83			Grados de libertad	83			Grados de libertad	83			Grados de libertad	83			Grados de libertad	83		Grados de libertad	83			Grados de libertad	83			Grados de libertad	83
Estadístico t	-0.678591			Estadístico t	1.53453			Estadístico t	-1.50624			Estadístico t	0.924615			Estadístico t	-0.915197		Estadístico t	0.425109			Estadístico t	0.844247			Estadístico t	-1.65269
P(T<=t) una cola	0.249643			P(T<=t) una cola	0.0643514			P(T<=t) una cola	0.0679014			P(T<=t) una cola	0.178923			P(T<=t) una cola	0.18137		P(T<=t) una cola	0.335929			P(T<=t) una cola	0.200479			P(T<=t) una cola	0.051086
Valor crítico de t (una cola)	1.66342			Valor crítico de t (una cola)	1.66342			Valor crítico de t (una cola)	1.66342			Valor crítico de t (una cola)	1.66342			Valor crítico de t (una cola)	1.66342		Valor crítico de t (una cola)	1.66342			Valor crítico de t (una cola)	1.66342			Valor crítico de t (una cola)	1.66342
P(T<=t) dos colas	0.499285			P(T<=t) dos colas	0.128703			P(T<=t) dos colas	0.135803			P(T<=t) dos colas	0.357847			P(T<=t) dos colas	0.36274		P(T<=t) dos colas	0.671857			P(T<=t) dos colas	0.400958			P(T<=t) dos colas	0.102172
Valor crítico de t (dos colas)	1.98896			Valor crítico de t (dos colas)	1.98896			Valor crítico de t (dos colas)	1.98896			Valor crítico de t (dos colas)	1.98896			Valor crítico de t (dos colas)	1.98896		Valor crítico de t (dos colas)	1.98896			Valor crítico de t (dos colas)	1.98896			Valor crítico de t (dos colas)	1.98896
Prueba t para dos muestras suponiendo varianzas iguales				Prueba t para dos muestras suponiendo varianzas iguales				Prueba t para dos muestras suponiendo varianzas iguales				Prueba t para dos muestras suponiendo varianzas iguales
28
	Variable 1	Variable 2			Variable 1	Variable 2			Variable 1	Variable 2			Variable 1	Variable 2
Media	0.517241	0.37037		Media	0.301887	0.724138		Media	0.189655	0.148148		Media	0.259259	0.0322581
Varianza	0.254083	0.242165		Varianza	0.214804	0.206897		Varianza	0.156382	0.131054		Varianza	0.195667	0.0322581
Observaciones	58	27		Observaciones	53	29		Observaciones	58	27		Observaciones	54	31
Varianza agrupada	0.25035			Varianza agrupada	0.212036			Varianza agrupada	0.148448			Varianza agrupada	0.136604
Diferencia hipotética de las medias	0			Diferencia hipotética de las medias	0			Diferencia hipotética de las medias	0			Diferencia hipotética de las medias	0
Grados de libertad	83			Grados de libertad	80			Grados de libertad	83			Grados de libertad	83
Estadístico t	1.25994			Estadístico t	-3.97005			Estadístico t	0.462403			Estadístico t	2.72562
P(T<=t) una cola	0.105612			P(T<=t) una cola	7.8005e-05			P(T<=t) una cola	0.322501			P(T<=t) una cola	0.00391337
Valor crítico de t (una cola)	1.66342			Valor crítico de t (una cola)	1.66412			Valor crítico de t (una cola)	1.66342			Valor crítico de t (una cola)	1.66342
P(T<=t) dos colas	0.211223			P(T<=t) dos colas	0.00015601			P(T<=t) dos colas	0.645002			P(T<=t) dos colas	0.00782674
Valor crítico de t (dos colas)	1.98896			Valor crítico de t (dos colas)	1.99006			Valor crítico de t (dos colas)	1.98896			Valor crítico de t (dos colas)	1.98896
Prueba t para dos muestras suponiendo varianzas iguales				Prueba t para dos muestras suponiendo varianzas iguales
29
	Variable 1	Variable 2			Variable 1	Variable 2
Media	0.0333333	0		Media	0.0588235	0.0454545
Varianza	0.0333333	0		Varianza	0.0588235	0.0454545
Observaciones	30	10		Observaciones	17	22
Varianza agrupada	0.0254386			Varianza agrupada	0.0512357
Diferencia hipotética de las medias	0			Diferencia hipotética de las medias	0
Grados de libertad	38			Grados de libertad	37
Estadístico t	0.572351			Estadístico t	0.182901
P(T<=t) una cola	0.285227			P(T<=t) una cola	0.427937
Valor crítico de t (una cola)	1.68595			Valor crítico de t (una cola)	1.68709
P(T<=t) dos colas	0.570455			P(T<=t) dos colas	0.855874
Valor crítico de t (dos colas)	2.02439			Valor crítico de t (dos colas)	2.02619
Prueba t para dos muestras suponiendo varianzas iguales				Prueba t para dos muestras suponiendo varianzas iguales				Prueba t para dos muestras suponiendo varianzas iguales				Prueba t para dos muestras suponiendo varianzas iguales				Prueba t para dos muestras suponiendo varianzas iguales				Prueba t para dos muestras suponiendo varianzas iguales					Prueba t para dos muestras suponiendo varianzas iguales					Prueba t para dos muestras suponiendo varianzas iguales				Prueba t para dos muestras suponiendo varianzas iguales				Prueba t para dos muestras suponiendo varianzas iguales				Prueba t para dos muestras suponiendo varianzas iguales				Prueba t para dos muestras suponiendo varianzas iguales
17.1				17.2				17.3				17.4				17.5				17.6					17.1 65
	Variable 1	Variable 2			Variable 1	Variable 2			Variable 1	Variable 2			Variable 1	Variable 2			Variable 1	Variable 2			Variable 1	Variable 2				Variable 1	Variable 2				Variable 1	Variable 2			Variable 1	Variable 2			Variable 1	Variable 2			Variable 1	Variable 2			Variable 1	Variable 2
Media	0.910714	0.884615		Media	0.803571	0.692308		Media	0.0714286	0.153846		Media	0.0178571	0.0769231		Media	0.482143	0.5		Media	0.232143	0.423077			Media	0.921569	0.83871			Media	0.784314	0.709677		Media	0.156863	0		Media	0.0392157	0.0645161		Media	0.470588	0.516129		Media	0.313725	0.258065
Varianza	0.0827922	0.106154		Varianza	0.160714	0.221538		Varianza	0.0675325	0.135385		Varianza	0.0178571	0.0738462		Varianza	0.254221	0.26		Varianza	0.181494	0.253846			Varianza	0.0737255	0.139785			Varianza	0.172549	0.212903		Varianza	0.134902	0		Varianza	0.0384314	0.0623656		Varianza	0.254118	0.258065		Varianza	0.219608	0.197849
Observaciones	56	26		Observaciones	56	26		Observaciones	56	26		Observaciones	56	26		Observaciones	56	26		Observaciones	56	26			Observaciones	51	31			Observaciones	51	31		Observaciones	51	31		Observaciones	51	31		Observaciones	51	31		Observaciones	51	31
Varianza agrupada	0.0900927			Varianza agrupada	0.179722			Varianza agrupada	0.0887363			Varianza agrupada	0.0353537			Varianza agrupada	0.256027			Varianza agrupada	0.204104				Varianza agrupada	0.0984978				Varianza agrupada	0.187682			Varianza agrupada	0.0843137			Varianza agrupada	0.0474067			Varianza agrupada	0.255598			Varianza agrupada	0.211448
Diferencia hipotética de las medias	0			Diferencia hipotética de las medias	0			Diferencia hipotética de las medias	0			Diferencia hipotética de las medias	0			Diferencia hipotética de las medias	0			Diferencia hipotética de las medias	0				Diferencia hipotética de las medias	0				Diferencia hipotética de las medias	0			Diferencia hipotética de las medias	0			Diferencia hipotética de las medias	0			Diferencia hipotética de las medias	0			Diferencia hipotética de las medias	0
Grados de libertad	80			Grados de libertad	80			Grados de libertad	80			Grados de libertad	80			Grados de libertad	80			Grados de libertad	80				Grados de libertad	80				Grados de libertad	80			Grados de libertad	80			Grados de libertad	80			Grados de libertad	80			Grados de libertad	80
Estadístico t	0.366396			Estadístico t	1.10593			Estadístico t	-1.16585			Estadístico t	-1.32371			Estadístico t	-0.148711			Estadístico t	-1.78087				Estadístico t	1.15927				Estadístico t	0.756481			Estadístico t	2.37208			Estadístico t	-0.510231			Estadístico t	-0.395532			Estadístico t	0.531505
P(T<=t) una cola	0.357518			P(T<=t) una cola	0.136036			P(T<=t) una cola	0.123569			P(T<=t) una cola	0.0946845			P(T<=t) una cola	0.441078			P(T<=t) una cola	0.039365				P(T<=t) una cola	0.124897				P(T<=t) una cola	0.225791			P(T<=t) una cola	0.0100452			P(T<=t) una cola	0.305647			P(T<=t) una cola	0.346752			P(T<=t) una cola	0.298271
Valor crítico de t (una cola)	1.66412			Valor crítico de t (una cola)	1.66412			Valor crítico de t (una cola)	1.66412			Valor crítico de t (una cola)	1.66412			Valor crítico de t (una cola)	1.66412			Valor crítico de t (una cola)	1.66412				Valor crítico de t (una cola)	1.66412				Valor crítico de t (una cola)	1.66412			Valor crítico de t (una cola)	1.66412			Valor crítico de t (una cola)	1.66412			Valor crítico de t (una cola)	1.66412			Valor crítico de t (una cola)	1.66412
P(T<=t) dos colas	0.715037			P(T<=t) dos colas	0.272072			P(T<=t) dos colas	0.247139			P(T<=t) dos colas	0.189369			P(T<=t) dos colas	0.882156			P(T<=t) dos colas	0.07873				P(T<=t) dos colas	0.249794				P(T<=t) dos colas	0.451583			P(T<=t) dos colas	0.0200904			P(T<=t) dos colas	0.611294			P(T<=t) dos colas	0.693503			P(T<=t) dos colas	0.596541
Valor crítico de t (dos colas)	1.99006			Valor crítico de t (dos colas)	1.99006			Valor crítico de t (dos colas)	1.99006			Valor crítico de t (dos colas)	1.99006			Valor crítico de t (dos colas)	1.99006			Valor crítico de t (dos colas)	1.99006				Valor crítico de t (dos colas)	1.99006				Valor crítico de t (dos colas)	1.99006			Valor crítico de t (dos colas)	1.99006			Valor crítico de t (dos colas)	1.99006			Valor crítico de t (dos colas)	1.99006			Valor crítico de t (dos colas)	1.99006
Prueba t para dos muestras suponiendo varianzas iguales				Prueba t para dos muestras suponiendo varianzas iguales				Prueba t para dos muestras suponiendo varianzas iguales				Prueba t para dos muestras suponiendo varianzas iguales				Prueba t para dos muestras suponiendo varianzas iguales				Prueba t para dos muestras suponiendo varianzas iguales					Prueba t para dos muestras suponiendo varianzas iguales					Prueba t para dos muestras suponiendo varianzas iguales				Prueba t para dos muestras suponiendo varianzas iguales				Prueba t para dos muestras suponiendo varianzas iguales				Prueba t para dos muestras suponiendo varianzas iguales				Prueba t para dos muestras suponiendo varianzas iguales
23.1
	Variable 1	Variable 2			Variable 1	Variable 2			Variable 1	Variable 2			Variable 1	Variable 2			Variable 1	Variable 2			Variable 1	Variable 2				Variable 1	Variable 2				Variable 1	Variable 2			Variable 1	Variable 2			Variable 1	Variable 2			Variable 1	Variable 2			Variable 1	Variable 2
Media	0.909091	0.888889		Media	0.477273	0.388889		Media	0.0454545	0.111111		Media	0.0227273	0		Media	0.522727	0.777778		Media	0.340909	0.388889			Media	0.941176	0.821429			Media	0.411765	0.464286		Media	0.0588235	0.0714286		Media	0.0294118	0		Media	0.588235	0.642857		Media	0.352941	0.357143
Varianza	0.0845666	0.104575		Varianza	0.255285	0.251634		Varianza	0.0443975	0.104575		Varianza	0.0227273	0		Varianza	0.255285	0.183007		Varianza	0.229915	0.251634			Varianza	0.057041	0.152116			Varianza	0.249554	0.257937		Varianza	0.057041	0.0687831		Varianza	0.0294118	0		Varianza	0.249554	0.238095		Varianza	0.235294	0.238095
Observaciones	44	18		Observaciones	44	18		Observaciones	44	18		Observaciones	44	18		Observaciones	44	18		Observaciones	44	18			Observaciones	34	28			Observaciones	34	28		Observaciones	34	28		Observaciones	34	28		Observaciones	34	28		Observaciones	34	28
Varianza agrupada	0.0902357			Varianza agrupada	0.254251			Varianza agrupada	0.0614478			Varianza agrupada	0.0162879			Varianza agrupada	0.234806			Varianza agrupada	0.236069				Varianza agrupada	0.0998249				Varianza agrupada	0.253326			Varianza agrupada	0.0623249			Varianza agrupada	0.0161765			Varianza agrupada	0.244398			Varianza agrupada	0.236555
Diferencia hipotética de las medias	0			Diferencia hipotética de las medias	0			Diferencia hipotética de las medias	0			Diferencia hipotética de las medias	0			Diferencia hipotética de las medias	0			Diferencia hipotética de las medias	0				Diferencia hipotética de las medias	0				Diferencia hipotética de las medias	0			Diferencia hipotética de las medias	0			Diferencia hipotética de las medias	0			Diferencia hipotética de las medias	0			Diferencia hipotética de las medias	0
Grados de libertad	60			Grados de libertad	60			Grados de libertad	60			Grados de libertad	60			Grados de libertad	60			Grados de libertad	60				Grados de libertad	60				Grados de libertad	60			Grados de libertad	60			Grados de libertad	60			Grados de libertad	60			Grados de libertad	60
Estadístico t	0.240366			Estadístico t	0.626482			Estadístico t	-0.946655			Estadístico t	0.636476			Estadístico t	-1.88121			Estadístico t	-0.352944				Estadístico t	1.48515				Estadístico t	-0.408899			Estadístico t	-0.19785			Estadístico t	0.906154			Estadístico t	-0.432953			Estadístico t	-0.0338517
P(T<=t) una cola	0.405433			P(T<=t) una cola	0.266688			P(T<=t) una cola	0.173806			P(T<=t) una cola	0.263444			P(T<=t) una cola	0.0323987			P(T<=t) una cola	0.362684				P(T<=t) una cola	0.0713694				P(T<=t) una cola	0.342035			P(T<=t) una cola	0.421916			P(T<=t) una cola	0.18424			P(T<=t) una cola	0.333301			P(T<=t) una cola	0.486554
Valor crítico de t (una cola)	1.67065			Valor crítico de t (una cola)	1.67065			Valor crítico de t (una cola)	1.67065			Valor crítico de t (una cola)	1.67065			Valor crítico de t (una cola)	1.67065			Valor crítico de t (una cola)	1.67065				Valor crítico de t (una cola)	1.67065				Valor crítico de t (una cola)	1.67065			Valor crítico de t (una cola)	1.67065			Valor crítico de t (una cola)	1.67065			Valor crítico de t (una cola)	1.67065			Valor crítico de t (una cola)	1.67065
P(T<=t) dos colas	0.810866			P(T<=t) dos colas	0.533375			P(T<=t) dos colas	0.347612			P(T<=t) dos colas	0.526887			P(T<=t) dos colas	0.0647975			P(T<=t) dos colas	0.725367				P(T<=t) dos colas	0.142739				P(T<=t) dos colas	0.68407			P(T<=t) dos colas	0.843831			P(T<=t) dos colas	0.368479			P(T<=t) dos colas	0.666602			P(T<=t) dos colas	0.973108
Valor crítico de t (dos colas)	2.0003			Valor crítico de t (dos colas)	2.0003			Valor crítico de t (dos colas)	2.0003			Valor crítico de t (dos colas)	2.0003			Valor crítico de t (dos colas)	2.0003			Valor crítico de t (dos colas)	2.0003				Valor crítico de t (dos colas)	2.0003				Valor crítico de t (dos colas)	2.0003			Valor crítico de t (dos colas)	2.0003			Valor crítico de t (dos colas)	2.0003			Valor crítico de t (dos colas)	2.0003			Valor crítico de t (dos colas)	2.0003
Prueba t para dos muestras suponiendo varianzas iguales				Prueba t para dos muestras suponiendo varianzas iguales				Prueba t para dos muestras suponiendo varianzas iguales				Prueba t para dos muestras suponiendo varianzas iguales				Prueba t para dos muestras suponiendo varianzas iguales				Prueba t para dos muestras suponiendo varianzas iguales					Prueba t para dos muestras suponiendo varianzas iguales					Prueba t para dos muestras suponiendo varianzas iguales				Prueba t para dos muestras suponiendo varianzas iguales				Prueba t para dos muestras suponiendo varianzas iguales				Prueba t para dos muestras suponiendo varianzas iguales				Prueba t para dos muestras suponiendo varianzas iguales
28.1
	Variable 1	Variable 2			Variable 1	Variable 2			Variable 1	Variable 2			Variable 1	Variable 2			Variable 1	Variable 2			Variable 1	Variable 2				Variable 1	Variable 2				Variable 1	Variable 2			Variable 1	Variable 2			Variable 1	Variable 2			Variable 1	Variable 2			Variable 1	Variable 2
Media	0.862069	0.9		Media	0.344828	0.6		Media	0.0344828	0.1		Media	0	0		Media	0.655172	0.9		Media	0.172414	0.3			Media	0.882353	0.863636			Media	0.294118	0.454545		Media	0.0588235	0.0454545		Media	0	0		Media	0.647059	0.772727		Media	0.176471	0.227273
Varianza	0.123153	0.1		Varianza	0.305419	0.266667		Varianza	0.0344828	0.1		Varianza	0	0		Varianza	0.23399	0.1		Varianza	0.147783	0.233333			Varianza	0.110294	0.123377			Varianza	0.345588	0.25974		Varianza	0.0588235	0.0454545		Varianza	0	0		Varianza	0.242647	0.183983		Varianza	0.154412	0.183983
Observaciones	29	10		Observaciones	29	10		Observaciones	29	10		Observaciones	29	10		Observaciones	29	10		Observaciones	29	10			Observaciones	17	22			Observaciones	17	22		Observaciones	17	22		Observaciones	16	21		Observaciones	17	22		Observaciones	17	22
Varianza agrupada	0.117521			Varianza agrupada	0.295993			Varianza agrupada	0.0504194			Varianza agrupada	0			Varianza agrupada	0.201398			Varianza agrupada	0.168593				Varianza agrupada	0.117719				Varianza agrupada	0.296864			Varianza agrupada	0.0512357			Varianza agrupada	0			Varianza agrupada	0.209351			Varianza agrupada	0.171195
Diferencia hipotética de las medias	0			Diferencia hipotética de las medias	0			Diferencia hipotética de las medias	0			Diferencia hipotética de las medias	0			Diferencia hipotética de las medias	0			Diferencia hipotética de las medias	0				Diferencia hipotética de las medias	0				Diferencia hipotética de las medias	0			Diferencia hipotética de las medias	0			Diferencia hipotética de las medias	0			Diferencia hipotética de las medias	0			Diferencia hipotética de las medias	0
Grados de libertad	37			Grados de libertad	37			Grados de libertad	37			Grados de libertad	37			Grados de libertad	37			Grados de libertad	37				Grados de libertad	37				Grados de libertad	37			Grados de libertad	37			Grados de libertad	35			Grados de libertad	37			Grados de libertad	37
Estadístico t	-0.30172			Estadístico t	-1.27897			Estadístico t	-0.795653			Estadístico t	65535			Estadístico t	-1.48765			Estadístico t	-0.847327				Estadístico t	0.16893				Estadístico t	-0.911811			Estadístico t	0.182901			Estadístico t	65535			Estadístico t	-0.850535			Estadístico t	-0.380224
P(T<=t) una cola	0.382278			P(T<=t) una cola	0.104436			P(T<=t) una cola	0.215655			P(T<=t) una cola	#NUM!			P(T<=t) una cola	0.072659			P(T<=t) una cola	0.20113				P(T<=t) una cola	0.433386				P(T<=t) una cola	0.183886			P(T<=t) una cola	0.427937			P(T<=t) una cola	#NUM!			P(T<=t) una cola	0.200249			P(T<=t) una cola	0.352977
Valor crítico de t (una cola)	1.68709			Valor crítico de t (una cola)	1.68709			Valor crítico de t (una cola)	1.68709			Valor crítico de t (una cola)	1.68709			Valor crítico de t (una cola)	1.68709			Valor crítico de t (una cola)	1.68709				Valor crítico de t (una cola)	1.68709				Valor crítico de t (una cola)	1.68709			Valor crítico de t (una cola)	1.68709			Valor crítico de t (una cola)	1.68957			Valor crítico de t (una cola)	1.68709			Valor crítico de t (una cola)	1.68709
P(T<=t) dos colas	0.764555			P(T<=t) dos colas	0.208872			P(T<=t) dos colas	0.431309			P(T<=t) dos colas	#NUM!			P(T<=t) dos colas	0.145318			P(T<=t) dos colas	0.402261				P(T<=t) dos colas	0.866772				P(T<=t) dos colas	0.367771			P(T<=t) dos colas	0.855874			P(T<=t) dos colas	#NUM!			P(T<=t) dos colas	0.400498			P(T<=t) dos colas	0.705953
Valor crítico de t (dos colas)	2.02619			Valor crítico de t (dos colas)	2.02619			Valor crítico de t (dos colas)	2.02619			Valor crítico de t (dos colas)	2.02619			Valor crítico de t (dos colas)	2.02619			Valor crítico de t (dos colas)	2.02619				Valor crítico de t (dos colas)	2.02619				Valor crítico de t (dos colas)	2.02619			Valor crítico de t (dos colas)	2.02619			Valor crítico de t (dos colas)	2.03011			Valor crítico de t (dos colas)	2.02619			Valor crítico de t (dos colas)	2.02619
Prueba t para dos muestras suponiendo varianzas iguales				Prueba t para dos muestras suponiendo varianzas iguales
	Variable 1	Variable 2			Variable 1	Variable 2
Media	4.68293	4.56		Media	4.68293	4.54167
Varianza	0.271951	0.423333		Varianza	0.271951	0.432971
Observaciones	41	25		Observaciones	41	24
Varianza agrupada	0.32872			Varianza agrupada	0.330736
Diferencia hipotética de las medias	0			Diferencia hipotética de las medias	0
Grados de libertad	64			Grados de libertad	63
Estadístico t	0.844936			Estadístico t	0.955696
P(T<=t) una cola	0.200647			P(T<=t) una cola	0.171439
Valor crítico de t (una cola)	1.66901			Valor crítico de t (una cola)	1.6694
P(T<=t) dos colas	0.401294			P(T<=t) dos colas	0.342879
Valor crítico de t (dos colas)	1.99773			Valor crítico de t (dos colas)	1.99834
					Prueba t para dos muestras suponiendo varianzas iguales				Prueba t para dos muestras suponiendo varianzas iguales			Prueba t para dos muestras suponiendo varianzas iguales				Prueba t para dos muestras suponiendo varianzas iguales				Prueba t para dos muestras suponiendo varianzas iguales
	SI								NO							NO SE
Prueba t para dos muestras suponiendo varianzas iguales	Variable 1	Variable 2				Variable 1	Variable 2			Variable 1	Variable 2		Variable 1	Variable 2			Variable 1	Variable 2			Variable 1	Variable 2
POST-14	0.6	0.428571			Media	0.560976	0.52		Media	0.311111	0.47619	Media	0.341463	0.4		Media	0.0888889	0.047619		Media	0.097561	0.08
	0.245455	0.257143			Varianza	0.252439	0.26		Varianza	0.219192	0.261905	Varianza	0.230488	0.25		Varianza	0.0828283	0.047619		Varianza	0.0902439	0.0766667
Media	45	21			Observaciones	41	25		Observaciones	45	21	Observaciones	41	25		Observaciones	45	21		Observaciones	41	25
Varianza	0.249107				Varianza agrupada	0.255274			Varianza agrupada	0.23254		Varianza agrupada	0.237805			Varianza agrupada	0.0718254			Varianza agrupada	0.0851524
Observaciones	0				Diferencia hipotética de las medias	0			Diferencia hipotética de las medias	0		Diferencia hipotética de las medias	0			Diferencia hipotética de las medias	0			Diferencia hipotética de las medias	0
Varianza agrupada	64				Grados de libertad	64			Grados de libertad	64		Grados de libertad	64			Grados de libertad	64			Grados de libertad	64
Diferencia hipotética de las medias	1.29967				Estadístico t	0.319604			Estadístico t	-1.29535		Estadístico t	-0.47305			Estadístico t	0.58269			Estadístico t	0.237159
Grados de libertad	0.0991875				P(T<=t) una cola	0.375155			P(T<=t) una cola	0.0999257		P(T<=t) una cola	0.318894			P(T<=t) una cola	0.281075			P(T<=t) una cola	0.406645
Estadístico t	1.66901				Valor crítico de t (una cola)	1.66901			Valor crítico de t (una cola)	1.66901		Valor crítico de t (una cola)	1.66901			Valor crítico de t (una cola)	1.66901			Valor crítico de t (una cola)	1.66901
P(T<=t) una cola	0.198375				P(T<=t) dos colas	0.75031			P(T<=t) dos colas	0.199851		P(T<=t) dos colas	0.637787			P(T<=t) dos colas	0.562149			P(T<=t) dos colas	0.813291
Valor crítico de t (una cola)	1.99773				Valor crítico de t (dos colas)	1.99773			Valor crítico de t (dos colas)	1.99773		Valor crítico de t (dos colas)	1.99773			Valor crítico de t (dos colas)	1.99773			Valor crítico de t (dos colas)	1.99773
P(T<=t) dos colas
Valor crítico de t (dos colas)
				Prueba t para dos muestras suponiendo varianzas iguales						Prueba t para dos muestras suponiendo varianzas iguales
	menos 65 h	mas 65 h
Prueba t para dos muestras suponiendo varianzas iguales	Variable 1	Variable 2			Variable 1	Variable 2					Variable 1	Variable 2
	0.698113	0.689655		Media	0.301887	0.310345				Media	53.0566	71.6207
	0.214804	0.221675		Varianza	0.214804	0.221675				Varianza	78.0544	22.5296
Media	53	29		Observaciones	53	29				Observaciones	53	29
Varianza	0.217209			Varianza agrupada	0.217209					Varianza agrupada	58.6207
Observaciones	0			Diferencia hipotética de las medias	0					Diferencia hipotética de las medias	0
Varianza agrupada	80			Grados de libertad	80					Grados de libertad	80
Diferencia hipotética de las medias	0.0785707			Estadístico t	-0.0785707					Estadístico t	-10.4973
Grados de libertad	0.468785			P(T<=t) una cola	0.468785					P(T<=t) una cola	5.2304e-17
Estadístico t	1.66412			Valor crítico de t (una cola)	1.66412					Valor crítico de t (una cola)	1.66412
P(T<=t) una cola	0.93757			P(T<=t) dos colas	0.93757					P(T<=t) dos colas	1.04608e-16
Valor crítico de t (una cola)	1.99006			Valor crítico de t (dos colas)	1.99006					Valor crítico de t (dos colas)	1.99006
P(T<=t) dos colas
Valor crítico de t (dos colas)

[truncated: 1 more sheets: Hoja4]
